# Supplementary material for: Gene copy number variation and its significance in cyanobacterial phylogeny
Source: PubMed Central journal article supplement (PMC3552681; doi:10.1186/1471-2180-12-177), 2012-08-15
Supplement: 1471-2180-12-177-S1.pdf [file 1471-2180-12-177-S1.pdf]

|                                                    |                       |                      |                                                        |                          |                                       |
|----------------------------------------------------|-----------------------|----------------------|--------------------------------------------------------|--------------------------|---------------------------------------|
| strain                                             | accession number      | gene annotation      | gene description                                       | protein accession number | location in the genome                |
| 1 1196Cyanothecce sp PCC8801 protein               | CP001287.1 ACK65303.1 | gene=PCC8801<br>1237 | protein=photosystem q(b) protein                       | protein id=ACK65303.1    | location=1288606..1289676             |
| 1 1946Cyanothecce sp PCC8801 protein               | CP001287.1 ACK66053.1 | gene=PCC8801<br>2016 | protein=photosystem q(b) protein                       | protein id=ACK66053.1    | location=2090110..2091180             |
| 2 14398Synecococcus sp RCC307 protein              | CT978603.1 CAK28343.1 | gene=psbA            | protein=Photosystem II protein D1                      | protein id=CAK28343.1    | location=complement(1279858..1280937) |
| 2 20088Synecococcus sp RCC307 protein              | CT978603.1 CAK28912.1 | gene=psbA            | protein=Photosystem II protein D1                      | protein id=CAK28912.1    | location=complement(1742058..1743137) |
| 2 21828Synecococcus sp RCC307 protein              | CT978603.1 CAK29086.1 | gene=psbA            | protein=Photosystem II protein D1                      | protein id=CAK29086.1    | location=1894037..1895116             |
| 5 1594Anabaena variabilis                          | CP000117.1 ABA21220.1 | gene=Ava_1597        | protein=Photosystem II reaction center protein PsbA/D1 | protein id=ABA21220.1    | location=complement(1971884..1972966) |
| ATCC29413 protein                                  | CP000117.1 ABA22075.1 | gene=Ava_2460        | protein=Photosystem II reaction center protein PsbA/D1 | protein id=ABA22075.1    | location=complement(3053603..3054685) |
| 5 2449Anabaena variabilis                          | CP000117.1 ABA23159.1 | gene=Ava_3553        | protein=Photosystem II reaction center protein PsbA/D1 | protein id=ABA23159.1    | location=complement(4422987..4424069) |
| ATCC29413 protein                                  | AP011615.1 BA191950.1 | gene=psbAIV          | protein=photosystem II reaction center D1 protein      | protein id=BA191950.1    | location=complement(4171577..4172656) |
| 6 4108Arthrospira platensis NIES-39 protein        | AP011615.1 BA191955.1 | gene=psbAIII         | protein=photosystem II reaction center D1 protein      | protein id=BA191955.1    | location=complement(4178243..4179322) |
| 6 4113Arthrospira platensis NIES-39 protein        | AP011615.1 BA194323.1 | gene=psbAII          | protein=photosystem II reaction center D1 protein      | protein id=BA194323.1    | location=complement(6629459..6630538) |
| 6 6481Arthrospira platensis NIES-39 protein        | BA000022.2 BAA16586.1 | gene=psbA2           | protein=photosystem II D1 protein                      | protein id=BAA16586.1    | location=7229..8311                   |
| 7 85Synecocystis sp PCC6803 protein                | BA000022.2 BAA18230.1 | gene=psbA3           | protein=photosystem II D1 protein                      | protein id=BAA18230.1    | location=complement(1818915..1819997) |
| 7 1651Synecocystis sp PCC6803 protein              | BA000045.2 BAC88720.1 | gene=psbA            | protein=photosystem II protein D1                      | protein id=BAC88720.1    | location=832184..833266               |
| 8 7798Synecococcus sp JA-3-3Ab protein             | BA000045.2 BAC90263.1 | gene=psbA            | protein=photosystem II protein D1                      | protein id=BAC90263.1    | location=2486614..2487696             |
| 8 23228Synecococcus sp JA-3-3Ab protein            | BA000045.2 BAC91085.1 | gene=psbA            | protein=photosystem II protein D1                      | protein id=BAC91085.1    | location=complement(3348383..3349465) |
| 8 31438Synecococcus sp JA-3-3Ab protein            | CP001291.1 ACK68639.1 | gene=PCC7424<br>0169 | protein=photosystem q(b) protein                       | protein id=ACK68639.1    | location=186554..187624               |
| 9 1055Cyanothecce sp PCC7424 protein               | CP001291.1 ACK69503.1 | gene=PCC7424<br>1049 | protein=photosystem q(b) protein                       | protein id=ACK69503.1    | location=1150654..1151724             |
| 9 1028Cyanothecce sp PCC7424 protein               | CP001291.1 ACK70715.1 | gene=PCC7424<br>2293 | protein=photosystem q(b) protein                       | protein id=ACK70715.1    | location=complement(2562885..2563955) |
| 9 2240Cyanothecce sp PCC7424 protein               | CP000554.1 ABM77161.1 | gene=psbA            | protein=Photosystem II PsbA protein (D1)               | protein id=ABM77161.1    | location=406385..407461               |
| 10 405Prochlorococcus marinus str MIT9303 protein  | CP000554.1 ABM78610.1 | gene=P9303_18681     | protein=Hypothetical protein                           | protein id=ABM78610.1    | location=1629607..1630683             |
| 10 1853Prochlorococcus marinus str MIT9303 protein | BA000019.2 BAB75271.1 | gene=psbAIV          | protein=photosystem II protein D1                      | protein id=BAB75271.1    | location=complement(4315437..4316519) |
| 12 3568Nostoc sp PCC7120 protein                   | BA000019.2 BAB75426.1 | gene=psbAII          | protein=photosystem II protein D1                      | protein id=BAB75426.1    | location=449998..4501080              |
| 12 3723Nostoc sp PCC7120 protein                   | BA000019.2 BAB76291.1 | gene=psbAIII         | protein=photosystem II protein D1                      | protein id=BAB76291.1    | location=5489831..5490913             |
| 12 4587Nostoc sp PCC7120 protein                   | AP009552.1 BAG00844.1 | gene=psbA1           | protein=photosystem II D1 protein                      | protein id=BAG00844.1    | location=complement(877533..878615)   |
| 14 1021Microcystis aeruginosa NIES-843 protein     | AP009552.1 BAG00860.1 | gene=psbA2           | protein=photosystem II D1 protein                      | protein id=BAG00860.1    | location=891585..892667               |
| 14 1037Microcystis aeruginosa NIES-843 protein     | AP009552.1 BAG00873.1 | gene=psbA3           | protein=photosystem II D1 protein                      | protein id=BAG00873.1    | location=900555..901637               |
| 14 1050Microcystis aeruginosa NIES-843 protein     | AP009552.1 BAG00902.1 | gene=psbA4           | protein=photosystem II D1 protein                      | protein id=BAG00902.1    | location=925990..927072               |
| 14 1079Microcystis aeruginosa NIES-843 protein     | AP009552.1 BAG05636.1 | gene=psbA5           | protein=photosystem II D1 protein                      | protein id=BAG05636.1    | location=5351373..5352455             |
| 14 5813Microcystis aeruginosa NIES-843 protein     | CP002059.1 ADI63253.1 | gene=Aazo_0830       | protein=photosystem q(b) protein                       | protein id=ADI63253.1    | location=879395..880477               |
| 15 584Nostoc azollae 0708 protein                  | CP002059.1 ADI63818.1 | gene=Aazo_1652       | protein=photosystem q(b) protein                       | protein id=ADI63818.1    | location=1720331..1721413             |
| 15 1149Nostoc azollae 0708 protein                 | CP000828.1 ABW27180.1 | gene=psbA            | protein=photosystem II D1 protein PsbA                 | protein id=ABW27180.1    | location=complement(2166714..2167796) |
| 16 2089A.charyochloris marina MBIC11017 protein    | CP000828.1 ABW27888.1 | gene=psbA            | protein=photosystem II D1 protein PsbA                 | protein id=ABW27888.1    | location=complement(2928273..2929355) |
| 16 2799A.charyochloris marina MBIC11017 protein    | CP001037.1 ACC80861.1 | gene=Npun_R2273      | protein=photosystem q(b) protein                       | protein id=ACC80861.1    | location=complement(2808705..2809787) |
| 17 2057Nostoc punctiforme PCC73102 protein         | CP001037.1 ACC81948.1 | gene=Npun_F3544      | protein=photosystem q(b) protein                       | protein id=ACC81948.1    | location=4451534..4452616             |
| 17 3144Nostoc punctiforme PCC73102 protein         | CP001037.1 ACC83520.1 | gene=Npun_R5188      | protein=photosystem q(b) protein                       | protein id=ACC83520.1    | location=complement(6424030..6425112) |

|    |                                                |                                                |            |            |                  |                                                              |                              |                                       |
|----|------------------------------------------------|------------------------------------------------|------------|------------|------------------|--------------------------------------------------------------|------------------------------|---------------------------------------|
| 18 | 1665Synecococcus PCC6301 protein               | elongatus                                      | AP008231.1 | BAD78356.1 | gene=psbAII      | protein=photosystem II D1 protein                            | protein id=BAD78356.1        | location=185180..186262               |
| 18 | 6475Synecococcus PCC6301 protein               | elongatus                                      | AP008231.1 | BAD78837.1 | gene=psbAIII     | protein=photosystem II D1 protein                            | protein id=BAD78837.1        | location=complement(716582..717064)   |
| 19 | 7793Gloeobacter violaceus PCC7421 protein      | violaceus                                      | BA000045.2 | BAC88720.1 | gene=psbA        | protein=photosystem II protein D1                            | protein id=BAC88720.1        | location=832184..833266               |
| 19 | 2322Gloeobacter PCC7421 protein                | violaceus                                      | BA000045.2 | BAC90263.1 | gene=psbA        | protein=photosystem II protein D1                            | protein id=BAC90263.1        | location=2486614..2487696             |
| 19 | 3145Gloeobacter PCC7421 protein                | violaceus                                      | BA000045.2 | BAC91085.1 | gene=psbA        | protein=photosystem II protein D1                            | protein id=BAC91085.1        | location=complement(3348383..3349465) |
| 20 | 1443Trichodesmium IMS101 protein               | erythraeum                                     | CP000393.1 | ABG49673.1 | gene=Tery 0182   | protein=photosystem q(b) protein                             | protein id=ABG49673.1        | location=269811..270872               |
| 20 | 1444Trichodesmium IMS101 protein               | erythraeum                                     | CP000393.1 | ABG49674.1 | gene=Tery 0183   | protein=photosystem q(b) protein                             | protein id=ABG49674.1        | location=271328..272389               |
| 20 | 4186Trichodesmium IMS101 protein               | erythraeum                                     | CP000393.1 | ABG53717.1 | gene=Tery 4763   | protein=photosystem q(b) protein                             | protein id=ABG53717.1        | location=complement(7315951..7317012) |
| 21 | 3665Synecococcus sp PCC7803 protein            | 1891Cyanothecae sp PCC8801 protein             | CT971583.1 | CAK22792.1 | gene=psbA        | protein=Photosystem II protein D1                            | protein id=CAK22792.1        | location=complement(384540..385619)   |
| 21 | 7905Synecococcus sp PCC7803 protein            | 156Cyanothecae sp PCC8801 protein              | CT971583.1 | CAK23216.1 | gene=psbA        | protein=Photosystem II protein D1                            | protein id=CAK23216.1        | location=776911..777990               |
| 21 | 2084Synecococcus sp PCC7803 protein            | 156Cyanothecae sp PCC8801 protein              | CT971583.1 | CAK24510.1 | gene=psbA        | protein=Photosystem II protein D1                            | protein id=CAK24510.1        | location=complement(1914146..1915225) |
| 22 | 1535Synecococcus sp PCC7002 protein            | 1891Cyanothecae sp PCC8801 protein             | CP000951.1 | ACA98171.1 | gene=psbA-II     | protein=photosystem II D1 subunit PsbA-II (Qb protein)       | protein id=ACA98171.1        | location=complement(161801..162847)   |
| 22 | 1391Synecococcus sp PCC7002 protein            | 1891Cyanothecae sp PCC8801 protein             | CP000951.1 | ACA99409.1 | gene=psbA        | protein=photosystem q(b) protein                             | protein id=ACA99409.1        | location=1489906..1490988             |
| 2  | 258Synecococcus sp RCC307 protein              | 1891Cyanothecae sp PCC8801 protein             | CP001287.1 | ACK64163.1 | gene=PCC88010056 | protein=photosystem II D2 protein (photosystem q(a) protein) | protein id=ACK64163.1        | location=complement(58944..60002)     |
| 2  | 1694Synecococcus sp RCC307 protein             | 1891Cyanothecae sp PCC8801 protein             | CP001287.1 | ACK65998.1 | gene=PCC8801960  | protein=photosystem II D2 protein (photosystem q(a) protein) | protein id=ACK65998.1        | location=2036321..2037379             |
| 3  | 1628Thermosynechococcus elongatus BP-1 protein | 1628Thermosynechococcus elongatus BP-1 protein | CP000117.1 | ABA20866.1 | gene=psbD        | protein=Photosystem II D2 protein                            | protein id=CAK27162.1        | location=256888..257946               |
| 5  | ATCC29413 protein                              | 100Anabaena 2601 Anabaena ATCC29413 protein    | CP000117.1 | ABA22127.1 | gene=psbDII      | protein=Photosystem II D2 protein                            | protein id=CAK28598.1        | location=1479498..1480556             |
| 6  | 1954A-throspira platensis NIES-39 protein      | 1954A-throspira platensis NIES-39 protein      | AP011615.1 | BA189796.1 | gene=psbD        | protein=Photosystem II reaction center D2 protein            | protein id=BA189796.1        | location=456131..457189               |
| 6  | 3148A-throspira platensis NIES-39 protein      | 3148A-throspira platensis NIES-39 protein      | AP011615.1 | BA190990.1 | gene=psbD        | protein=Photosystem II reaction center D2 protein            | protein id=BA190990.1        | location=1702500..1703558             |
| 7  | 19221Synecocystis sp PCC6803 protein           | 19221Synecocystis sp PCC6803 protein           | BA000022.2 | BAA17800.1 | gene=psbD        | protein=photosystem II D2 protein                            | protein id=BAA17800.1        | location=1529297..1530352             |
| 7  | 2881Synecocystis sp PCC6803 protein            | 2881Synecocystis sp PCC6803 protein            | BA000022.2 | BAA10851.1 | gene=psbD2       | protein=photosystem II D2 protein                            | protein id=BA10851.1         | location=complement(3106302..3107357) |
| 9  | 5666Cyanothecae sp PCC7424 protein             | 5666Cyanothecae sp PCC7424 protein             | CP001291.1 | ACK69040.1 | gene=PCC74240579 | protein=photosystem II D2 protein (photosystem q(a) protein) | protein id=ACK69040.1        | location=1968930..1969988             |
| 9  | 2902Cyanothecae sp PCC7424 protein             | 2902Cyanothecae sp PCC7424 protein             | CP001291.1 | ACK71377.1 | gene=PCC74242974 | protein=photosystem II D2 protein (photosystem q(a) protein) | protein id=ACK71377.1        | location=3179356..3180414             |
| 12 | 4285Nostoc sp PCC7120 protein                  | 4285Nostoc sp PCC7120 protein                  | BA000019.2 | BAB75989.1 | gene=psbD        | protein=photosystem II D2 protein                            | protein id=BA179356..3180414 | location=complement(1348840..1348998) |
| 12 | 4543Nostoc sp PCC7120 protein                  | 4543Nostoc sp PCC7120 protein                  | BA000019.2 | BAB76247.1 | gene=psbD        | protein=photosystem II D2 protein                            | protein id=BA179356..3180414 | location=3229780..3230838             |
| 14 | 1797Microcystis aeruginosa NIES-843 protein    | 1797Microcystis aeruginosa NIES-843 protein    | AP009552.1 | BAG01620.1 | gene=psbD2       | protein=photosystem II reaction center D2 protein            | protein id=BAG01620.1        | location=complement(636371..637429)   |
| 14 | 4112M. aeruginosa NIES-843 protein             | 4112M. aeruginosa NIES-843 protein             | AP009552.1 | BAG03938.1 | gene=psbD1       | protein=photosystem II reaction center D2 protein            | protein id=BAG03938.1        | location=complement(3317859..3318917) |
| 15 | 747Nostoc azollae 0708 protein                 | 747Nostoc azollae 0708 protein                 | CP002059.1 | ADI63416.1 | gene=Aazo 1059   | protein=photosystem II D2 protein (photosystem q(a) protein) | protein id=ADI63416.1        | location=5143731..5144786             |
| 15 | 2645Nostoc azollae 0708 protein                | 2645Nostoc azollae 0708 protein                | CP002059.1 | ADI65314.1 | gene=Aazo 3778   | protein=photosystem II D2 protein (photosystem q(a) protein) | protein id=ADI65314.1        | location=5441150..5442205             |
| 16 | 1031A. chrysochloris MBIC11017 protein         | 1031A. chrysochloris MBIC11017 protein         | CP000828.1 | ABW26122.1 | gene=psbD        | protein=photosystem II D2 protein P-sbD                      | protein id=ABW26122.1        | location=1613898..1614953             |
| 16 | 3977A. chrysochloris MBIC11017 protein         | 3977A. chrysochloris MBIC11017 protein         | CP000828.1 | ABW29065.1 | gene=psbD        | protein=photosystem II D2 protein P-sbD                      | protein id=ABW29065.1        | location=complement(3780970..3782025) |
| 17 | 3223Nostoc punctiforme PCC73102 protein        | 3223Nostoc punctiforme PCC73102 protein        | CP001037.1 | ACC82027.1 | gene=Npun R3637  | protein=photosystem II D2 protein (photosystem q(a) protein) | protein id=ACC82027.1        | location=1131903..1132958             |
| 17 | 4110Nostoc punctiforme PCC73102 protein        | 4110Nostoc punctiforme PCC73102 protein        | CP001037.1 | ACC82914.1 | gene=Npun F4553  | protein=photosystem II D2 protein (photosystem q(a) protein) | protein id=ACC82914.1        | location=3834890..3835945             |
| 18 | 8735Synecococcus PCC6301 protein               | elongatus                                      | AP008231.1 | BAD79063.1 | gene=psbDI       | protein=photosystem II D2 protein                            | protein id=1050536..1051591  | location=1050536..1051591             |
| 18 | 2447Synecococcus PCC6301 protein               | elongatus                                      | AP008231.1 | BAD80638.1 | gene=psbDII      | protein=photosystem II D2 protein                            | protein id=ABW26122.1        | location=complement(4131304..4132359) |
| 21 | 16475Synecococcus sp PCC7803 protein           | 16475Synecococcus sp PCC7803 protein           | CT971583.1 | CAK24073.1 | gene=psbD        | protein=Photosystem II D2 protein                            | protein id=ABW29065.1        | location=complement(4583337..4584392) |
| 21 | 22398Synecococcus sp PCC7803 protein           | 22398Synecococcus sp PCC7803 protein           | CT971583.1 | CAK24665.1 | gene=psbD        | protein=Photosystem II D2 protein                            | protein id=ACC82914.1        | location=5658199..5659254             |
| 22 | 15335Synecococcus sp PCC7002 protein           | 15335Synecococcus sp PCC7002 protein           | CP000951.1 | ACA99551.1 | gene=psbD        | protein=photosystem II reaction center D2 protein            | protein id=BAD79063.1        | location=complement(969581..970639)   |
| 22 | 2161Synecococcus sp PCC7002 protein            | 2161Synecococcus sp PCC7002 protein            | CP000951.1 | ACB00180.1 | gene=psbD        | protein=photosystem II D2 protein                            | protein id=2610565..2611623  | location=1513257..1514312             |

|                                               |                                           |                                         |                                         |                                                   |                                                                 |
|-----------------------------------------------|-------------------------------------------|-----------------------------------------|-----------------------------------------|---------------------------------------------------|-----------------------------------------------------------------|
| strain<br>1 3242Cyanotheca sp PCC8801 protein | accession number<br>CP001287.1 ACK67350.1 | gene annotation<br>gene=PCC8801<br>3382 | gene description<br>protein=transposase | protein accession number<br>protein id=ACK67350.1 | location in the genome<br>location=complement(3528365..3529384) |
| 1 3688Cyanotheca sp PCC8801 protein           | CP001287.1 ACK67796.1                     | gene=PCC8801<br>3846                    | protein=transposase                     | protein id=ACK67796.1                             | location=complement(4025990..4027009)                           |
| 5 261Anabaena variabilis ATCC29413 protein    | CP000117.1 ABA19887.1                     | gene=Ava_0261                           | protein=transposase, IS4 family         | protein id=ABA19887.1                             | location=334202..335224                                         |
| 5 3135Anabaena variabilis ATCC29413 protein   | CP000117.1 ABA22761.1                     | gene=Ava_3153                           | protein=transposase, IS4 family         | protein id=ABA22761.1                             | location=3914670..3915692                                       |
| 7 1078Synecocystis sp PCC6803 protein         | BA000022.2 BAA17657.1                     | gene=sll1780                            | protein=transposase                     | protein id=BAA17657.1                             | location=complement(1200376..1201392)                           |
| 7 1576Synecocystis sp PCC6803 protein         | BA000022.2 BAA18155.1                     | gene=sll1255                            | protein=transposase                     | protein id=BAA18155.1                             | location=complement(1729012..1730028)                           |
| 7 1793Synecocystis sp PCC6803 protein         | BA000022.2 BAA18372.1                     | gene=sll1560                            | protein=transposase                     | protein id=BAA18372.1                             | location=complement(1970952..1971968)                           |
| 7 1868Synecocystis sp PCC6803 protein         | BA000022.2 BAA18447.1                     | gene=sll1635                            | protein=transposase                     | protein id=BAA18447.1                             | location=2048497..2049513                                       |
| 7 2098Synecocystis sp PCC6803 protein         | BA000022.2 BAA10067.1                     | gene=sll1080                            | protein=transposase                     | protein id=BAA10067.1                             | location=2327013..2328029                                       |
| 7 3020Synecocystis sp PCC6803 protein         | BA000022.2 BAA18731.1                     | gene=sll1474                            | protein=transposase                     | protein id=BAA18731.1                             | location=complement(3400402..3401418)                           |
| 7 761Synecococcus sp JA-3-3Ab protein         | BA000045.2 BAC88702.1                     | gene=gr0761                             | protein=gr0761                          | protein id=BAC88702.1                             | location=813826..814881                                         |
| 8 1195Synecococcus sp JA-3-3Ab protein        | BA000045.2 BAC89136.1                     | gene=gll1195                            | protein=gll1195                         | protein id=BAC89136.1                             | location=complement(1271101..1272156)                           |
| 17 1266Nostoc punctiforme PCC73102 protein    | CP001037.1 ACC80069.1                     | gene=Npun_F1359                         | protein=transposase, IS4 family         | protein id=ACC80069.1                             | location=1653292..1654314                                       |
| 17 1374Nostoc punctiforme PCC73102 protein    | CP001037.1 ACC80177.1                     | gene=Npun_F1481                         | protein=transposase, IS4 family         | protein id=ACC80177.1                             | location=1818320..1819342                                       |
| 17 2675Nostoc punctiforme PCC73102 protein    | CP001037.1 ACC81479.1                     | gene=Npun_F2948                         | protein=transposase, IS4 family         | protein id=ACC81479.1                             | location=3648697..3649719                                       |
| 17 3118Nostoc punctiforme PCC73102 protein    | CP001037.1 ACC81922.1                     | gene=Npun_F3516                         | protein=transposase, IS4 family         | protein id=ACC81922.1                             | location=4420430..4421452                                       |
| 17 3218Nostoc punctiforme PCC73102 protein    | CP001037.1 ACC82022.1                     | gene=Npun_F3628                         | protein=transposase, IS4 family         | protein id=ACC82022.1                             | location=4572908..4573930                                       |
| 19 761Gloeobacter violaceus PCC7421 protein   | BA000045.2 BAC88702.1                     | gene=gr0761                             | protein=gr0761                          | protein id=BAC88702.1                             | location=813826..814881                                         |
| 19 1195Gloeobacter violaceus PCC7421 protein  | BA000045.2 BAC89136.1                     | gene=gll1195                            | protein=gll1195                         | protein id=BAC89136.1                             | location=complement(1271101..1272156)                           |
| 8 872Synecococcus sp JA-3-3Ab protein         | BA000045.2 BAC88813.1                     | gene=gr0872                             | protein=gr0872                          | protein id=BAC88813.1                             | location=919913..920968                                         |
| 8 1093Synecococcus sp JA-3-3Ab protein        | BA000045.2 BAC89034.1                     | gene=gll1093                            | protein=gll1093                         | protein id=BAC89034.1                             | location=complement(1171434..1172489)                           |
| 8 2126Synecococcus sp JA-3-3Ab protein        | BA000045.2 BAC90067.1                     | gene=gll2126                            | protein=gll2126                         | protein id=BAC90067.1                             | location=complement(2280085..2281140)                           |
| 19 872Gloeobacter violaceus PCC7421 protein   | BA000045.2 BAC88813.1                     | gene=gr0872                             | protein=gr0872                          | protein id=BAC88813.1                             | location=919913..920968                                         |
| 19 1093Gloeobacter violaceus PCC7421 protein  | BA000045.2 BAC89034.1                     | gene=gll1093                            | protein=gll1093                         | protein id=BAC89034.1                             | location=complement(1171434..1172489)                           |
| 19 2126Gloeobacter violaceus PCC7421 protein  | BA000045.2 BAC90067.1                     | gene=gll2126                            | protein=gll2126                         | protein id=BAC90067.1                             | location=complement(2280085..2281140)                           |
| 8 209Synecococcus sp JA-3-3Ab protein         | BA000045.2 BAC88150.1                     | gene=gll0209                            | protein=gll0209                         | protein id=BAC88150.1                             | location=complement(202099..203154)                             |
| 8 1105Synecococcus sp JA-3-3Ab protein        | BA000045.2 BAC89046.1                     | gene=gll1105                            | protein=gll1105                         | protein id=BAC89046.1                             | location=complement(1185264..1186319)                           |
| 19 209Gloeobacter violaceus PCC7421 protein   | BA000045.2 BAC88150.1                     | gene=gll0209                            | protein=gll0209                         | protein id=BAC88150.1                             | location=complement(202099..203154)                             |
| 19 1105Gloeobacter violaceus PCC7421 protein  | BA000045.2 BAC89046.1                     | gene=gll1105                            | protein=gll1105                         | protein id=BAC89046.1                             | location=complement(1185264..1186319)                           |
| 6 3383Arthrospira platensis NIES-39 protein   | AP011615.1 BA191225.1                     | gene=NIES39<br>J01730                   | protein=putative transposase            | protein id=BA191225.1                             | location=3451691..3452098                                       |
| 6 3707Arthrospira platensis NIES-39 protein   | AP011615.1 BA191549.1                     | gene=NIES39<br>J05030                   | protein=putative transposase            | protein id=BA191549.1                             | location=3760401..3760823                                       |
| 6 4464Arthrospira platensis NIES-39 protein   | AP011615.1 BA192306.1                     | gene=NIES39<br>L01450                   | protein=putative transposase            | protein id=BA192306.1                             | location=complement(4567432..4567854)                           |
| 8 1611Synecococcus sp JA-3-3Ab protein        | BA000045.2 BAC89552.1                     | gene=gll1611                            | protein=gll1611                         | protein id=BAC89552.1                             | location=complement(1728502..1728960)                           |
| 8 1727Synecococcus sp JA-3-3Ab protein        | BA000045.2 BAC89668.1                     | gene=gr1727                             | protein=gr1727                          | protein id=BAC89668.1                             | location=1833160..1833618                                       |
| 8 4074Synecococcus sp JA-3-3Ab protein        | BA000045.2 BAC92017.1                     | gene=gr4076                             | protein=gr4076                          | protein id=BAC92017.1                             | location=4271569..4272027                                       |

|    |       |               |                   |            |            |                    |                                        |                       |                                       |
|----|-------|---------------|-------------------|------------|------------|--------------------|----------------------------------------|-----------------------|---------------------------------------|
| 16 | 1072A | charyochloris | marina            | CP000828.1 | ABW26163.1 | gene=AM1_1124      | protein=transposase, putative          | protein_id=ABW26163.1 | location=1099836..1100309             |
| 16 | 1257A | charyochloris | marina            | CP000828.1 | ABW26348.1 | gene=AM1_1314      | protein=transposase, putative          | protein_id=ABW26348.1 | location=1300852..1301325             |
| 16 | 3820A | charyochloris | marina            | CP000828.1 | ABW28908.1 | gene=AM1_3923      | protein=conserved hypothetical protein | protein_id=ABW28908.1 | location=3974665..3975138             |
| 19 | 1611G | gloeobacter   | violaceus         | BA000045.2 | BAC89552.1 | gene=gll1611       | protein=gll1611                        | protein_id=BAC89552.1 | location=complement(1728502..1728960) |
| 19 | 1727G | gloeobacter   | violaceus         | BA000045.2 | BAC89668.1 | gene=gfr1727       | protein=gfr1727                        | protein_id=BAC89668.1 | location=1833160..1833618             |
| 19 | 4074G | gloeobacter   | violaceus         | BA000045.2 | BAC92017.1 | gene=gfr4076       | protein=gfr4076                        | protein_id=BAC92017.1 | location=4271569..4272027             |
| 20 | 1086F | Trichodesmium | erythraeum        | CP000393.1 | ABG50616.1 | gene=Tery_1283     | protein=hypothetical protein           | protein_id=ABG50616.1 | location=1963943..1964374             |
| 20 | 1992F | Trichodesmium | erythraeum        | CP000393.1 | ABG51522.1 | gene=Tery_2298     | protein=hypothetical protein           | protein_id=ABG51522.1 | location=complement(3567237..3567647) |
| 20 | 2498F | Trichodesmium | erythraeum        | CP000393.1 | ABG52028.1 | gene=Tery_2854     | protein=hypothetical protein           | protein_id=ABG52028.1 | location=complement(4445965..4446375) |
| 20 | 2672F | Trichodesmium | erythraeum        | CP000393.1 | ABG52203.1 | gene=Tery_3055     | protein=hypothetical protein           | protein_id=ABG52203.1 | location=complement(4715752..4716162) |
| 16 | 452A  | charyochloris | marina            | CP000828.1 | ABW25543.1 | gene=AM1_0490      | protein=transposase, putative          | protein_id=ABW25543.1 | location=469494..469901               |
| 16 | 462A  | charyochloris | marina            | CP000828.1 | ABW25553.1 | gene=AM1_0500      | protein=transposase, putative          | protein_id=ABW25553.1 | location=complement(477089..477496)   |
| 16 | 2018A | charyochloris | marina            | CP000828.1 | ABW27109.1 | gene=AM1_2094      | protein=conserved hypothetical protein | protein_id=ABW27109.1 | location=2086211..2086618             |
| 5  | 798A  | Anabaena      | variabilis        | ATCC29413  | CP000117.1 | gene=Ava_0800      | protein=transposase                    | protein_id=ABA20424.1 | location=981653..982036               |
| 5  | 1016A | Anabaena      | variabilis        | ATCC29413  | CP000117.1 | gene=Ava_1018      | protein=transposase                    | protein_id=ABA20642.1 | location=1228979..1229362             |
| 5  | 1362A | Anabaena      | variabilis        | ATCC29413  | CP000117.1 | gene=Ava_1364      | protein=transposase                    | protein_id=ABA20988.1 | location=complement(1680843..1681226) |
| 5  | 2629A | Anabaena      | variabilis        | ATCC29413  | CP000117.1 | gene=Ava_2641      | protein=transposase                    | protein_id=ABA22255.1 | location=3269211..3269594             |
| 5  | 3298A | Anabaena      | variabilis        | ATCC29413  | CP000117.1 | gene=Ava_3317      | protein=transposase                    | protein_id=ABA22924.1 | location=4141228..4141611             |
| 5  | 3779A | Anabaena      | variabilis        | ATCC29413  | CP000117.1 | gene=Ava_3800      | protein=transposase                    | protein_id=ABA23405.1 | location=4735420..4735803             |
| 7  | 784S  | Synechocystis | sp PCC6803        | protein    | BA000022.2 | gene=sll1791       | protein=transposase                    | protein_id=BAA17363.1 | location=complement(852895..853281)   |
| 7  | 2741S | Synechocystis | sp PCC6803        | protein    | BA000022.2 | gene=slr0799       | protein=transposase                    | protein_id=BAA10711.1 | location=3066429..3066752             |
| 12 | 16N   | Nostoc        | sp PCC7120        | protein    | BA000019.2 | gene=al0016        | protein=transposase                    | protein_id=BAB77540.1 | location=complement(13138..13521)     |
| 12 | 2689N | Nostoc        | sp PCC7120        | protein    | BA000019.2 | gene=al2693        | protein=transposase                    | protein_id=BAB74392.1 | location=complement(3284646..3285029) |
| 12 | 3606N | Nostoc        | sp PCC7120        | protein    | BA000019.2 | gene=al3610        | protein=transposase                    | protein_id=BAB75309.1 | location=4361124..4361507             |
| 12 | 4395N | Nostoc        | sp PCC7120        | protein    | BA000019.2 | gene=al4400        | protein=transposase                    | protein_id=BAB76099.1 | location=complement(5276131..5276514) |
| 12 | 4433N | Nostoc        | sp PCC7120        | protein    | BA000019.2 | gene=al4438        | protein=transposase                    | protein_id=BAB76137.1 | location=5322370..5322753             |
| 12 | 4812N | Nostoc        | sp PCC7120        | protein    | BA000019.2 | gene=al4817        | protein=transposase                    | protein_id=BAB76516.1 | location=complement(5735861..5736244) |
| 12 | 5152N | Nostoc        | sp PCC7120        | protein    | BA000019.2 | gene=al5157        | protein=transposase                    | protein_id=BAB76856.1 | location=6156759..6157142             |
| 15 | 3396N | Nostoc        | azollae 0708      | protein    | CP002059.1 | gene=Azo_4932      | protein=transposase                    | protein_id=ADI68065.1 | location=complement(5047600..5047983) |
| 15 | 3550N | Nostoc        | azollae 0708      | protein    | CP002059.1 | gene=Azo_5164      | protein=transposase                    | protein_id=ADI66219.1 | location=5290637..5291020             |
| 15 | 3222N | Nostoc        | azollae 0708      | protein    | CP002059.1 | gene=Azo_0453      | protein=transposase                    | protein_id=ADI62991.1 | location=468637..469020               |
| 15 | 3126N | Nostoc        | azollae 0708      | protein    | CP002059.1 | gene=Azo_0452      | protein=transposase                    | protein_id=ADI65795.1 | location=461761..4617994              |
| 6  | 4008A | Throspira     | platensis NIES-39 | protein    | AP011615.1 | gene=NIES39_K02030 | protein=putative transposase           | protein_id=BAI91850.1 | location=4067817..4068176             |
| 6  | 4011A | Throspira     | platensis NIES-39 | protein    | AP011615.1 | gene=NIES39_K02060 | protein=putative transposase           | protein_id=BAI91853.1 | location=complement(4069017..4069376) |
| 8  | 1612S | Synechococcus | sp JA-3-3Ab       | protein    | BA000045.2 | gene=gll1612       | protein=gll1612                        | protein_id=BAC89553.1 | location=complement(1728993..1729379) |
| 8  | 1726S | Synechococcus | sp JA-3-3Ab       | protein    | BA000045.2 | gene=gfr1726       | protein=gfr1726                        | protein_id=BAC89667.1 | location=1832741..1833127             |
| 8  | 4073S | Synechococcus | sp JA-3-3Ab       | protein    | BA000045.2 | gene=gfr4075       | protein=gfr4075                        | protein_id=BAC92016.1 | location=4271150..4271536             |
| 19 | 1612G | gloeobacter   | violaceus         | BA000045.2 | BAC89553.1 | gene=gll1612       | protein=gll1612                        | protein_id=BAC89553.1 | location=complement(1728993..1729379) |
| 19 | 1726G | gloeobacter   | violaceus         | BA000045.2 | BAC89667.1 | gene=gfr1726       | protein=gfr1726                        | protein_id=BAC89667.1 | location=1832741..1833127             |
| 19 | 4073G | gloeobacter   | violaceus         | BA000045.2 | BAC92016.1 | gene=gfr4075       | protein=gfr4075                        | protein_id=BAC92016.1 | location=4271150..4271536             |

|    |       |                                 |           |            |            |                       |                                                             |                       |                                        |
|----|-------|---------------------------------|-----------|------------|------------|-----------------------|-------------------------------------------------------------|-----------------------|----------------------------------------|
| 6  | 2123A | <i>Arthrospira platensis</i>    | NIES-39   | AP011615.1 | BA189965.1 | gene=NIES39           | protein=putative transposase                                | protein id=BA189965.1 | location=2128937..2129296              |
| 6  | 3647A | <i>Arthrospira platensis</i>    | NIES-39   | AP011615.1 | BA191489.1 | D05480<br>gene=NIES39 | protein=putative transposase                                | protein id=BA191489.1 | location=complement(3710514...3710873) |
| 20 | 1085T | <i>Trichodesmium erythraeum</i> |           | CP000393.1 | ABG50615.1 | gene=Tery 1282        | protein=putative transposase                                | protein id=ABG50615.1 | location=1963528..1963887              |
| 10 | 1993T | <i>Trichodesmium erythraeum</i> |           | CP000393.1 | ABG51523.1 | gene=Tery 2299        | protein=putative transposase                                | protein id=ABG51523.1 | location=complement(3567724...3568083) |
| 20 | 2499T | <i>Trichodesmium erythraeum</i> |           | CP000393.1 | ABG52029.1 | gene=Tery 2855        | protein=putative transposase                                | protein id=ABG52029.1 | location=complement(4446452...4446811) |
| 10 | 2673T | <i>Trichodesmium erythraeum</i> |           | CP000393.1 | ABG52204.1 | gene=Tery 3056        | protein=putative transposase                                | protein id=ABG52204.1 | location=complement(4716239...4716598) |
| 1  | 135C  | <i>Cyanothece</i> sp PCC8801    | protein   | CP001287.1 | ACK65460.1 | gene=PCC8801<br>1400  | protein=RNA-directed DNA polymerase (Reverse transcriptase) | protein id=ACK65460.1 | location=1464222..1466045              |
| 1  | 284C  | <i>Cyanothece</i> sp PCC8801    | protein   | CP001287.1 | ACK65461.1 | gene=PCC8801<br>1402  | protein=RNA-directed DNA polymerase (Reverse transcriptase) | protein id=ACK65461.1 | location=1466831..1468654              |
| 1  | 284F  | <i>Cyanothece</i> sp PCC8801    | protein   | CP001287.1 | ACK66954.1 | gene=PCC8801<br>2962  | protein=RNA-directed DNA polymerase (Reverse transcriptase) | protein id=ACK66954.1 | location=3059473...3061296             |
| 1  | 284G  | <i>Cyanothece</i> sp PCC8801    | protein   | CP001287.1 | ACK66955.1 | gene=PCC8801<br>2964  | protein=RNA-directed DNA polymerase (Reverse transcriptase) | protein id=ACK66955.1 | location=3062082...3063905             |
| 6  | 452A  | <i>Arthrospira platensis</i>    | NIES-39   | AP011615.1 | BA188294.1 | gene=NIES39<br>A04500 | protein=reverse transcriptase                               | protein id=BA188294.1 | location=455495...457261               |
| 6  | 998A  | <i>Arthrospira platensis</i>    | NIES-39   | AP011615.1 | BA188840.1 | gene=NIES39<br>B00830 | protein=reverse transcriptase                               | protein id=BA188840.1 | location=985697...987463               |
| 6  | 1914A | <i>Arthrospira platensis</i>    | NIES-39   | AP011615.1 | BA189756.1 | gene=NIES39<br>D03570 | protein=reverse transcriptase                               | protein id=BA189756.1 | location=complement(1937168...1938934) |
| 6  | 4356A | <i>Arthrospira platensis</i>    | NIES-39   | AP011615.1 | BA192198.1 | gene=NIES39<br>L00370 | protein=reverse transcriptase                               | protein id=BA192198.1 | location=complement(4471823...4473589) |
| 6  | 3007A | <i>Arthrospira platensis</i>    | NIES-39   | AP011615.1 | BA192849.1 | gene=NIES39<br>M00130 | protein=reverse transcriptase                               | protein id=BA192849.1 | location=complement(5088414...5090180) |
| 6  | 6149A | <i>Arthrospira platensis</i>    | NIES-39   | AP011615.1 | BA193991.1 | gene=NIES39<br>P00130 | protein=reverse transcriptase                               | protein id=BA193991.1 | location=complement(6262865...6264631) |
| 9  | 949C  | <i>Cyanothece</i> sp PCC7424    | protein   | CP001291.1 | ACK69423.1 | gene=PCC7424<br>0968  | protein=RNA-directed DNA polymerase (Reverse transcriptase) | protein id=ACK69423.1 | location=complement(1073514...1075460) |
| 9  | 3260C | <i>Cyanothece</i> sp PCC7424    | protein   | CP001291.1 | ACK71735.1 | gene=PCC7424<br>3336  | protein=RNA-directed DNA polymerase (Reverse transcriptase) | protein id=ACK71735.1 | location=3733467...3735413             |
| 14 | 585A  | <i>Microcystis aeruginosa</i>   | NIES-843  | AP009552.1 | BAG00407.1 | gene=MAE 09850        | protein=putative group II intron/matrix protein             | protein id=BAG00407.1 | location=511461...513305               |
| 14 | 1995A | <i>Microcystis aeruginosa</i>   | NIES-843  | AP009552.1 | BAG01818.1 | gene=MAE 19960        | protein=RNA-directed DNA polymerase                         | protein id=BAG01818.1 | location=complement(1788827...1790671) |
| 14 | 620A  | <i>Microcystis aeruginosa</i>   | NIES-843  | AP009552.1 | BAG06027.1 | gene=MAE 62050        | protein=probable reverse transcriptase                      | protein id=BAG06027.1 | location=5747312...5749156             |
| 20 | 196T  | <i>Trichodesmium erythraeum</i> |           | CP000393.1 | ABG49726.1 | gene=Tery 0239        | protein=RNA-directed DNA polymerase                         | protein id=ABG49726.1 | location=373560...375467               |
| 20 | 2880T | <i>Trichodesmium erythraeum</i> |           | CP000393.1 | ABG52411.1 | gene=Tery 3305        | protein=RNA-directed DNA polymerase                         | protein id=ABG52411.1 | location=5068307...5070214             |
| 5  | 78A   | <i>Anabaena variabilis</i>      | ATCC29413 | CP000117.1 | ABA19704.1 | gene=Ava 0078         | protein=Gas vesicle protein GVPa                            | protein id=ABA19704.1 | location=complement(100886...101101)   |
| 5  | 79A   | <i>Anabaena variabilis</i>      | ATCC29413 | CP000117.1 | ABA19705.1 | gene=Ava 0079         | protein=Gas vesicle protein GVPa                            | protein id=ABA19705.1 | location=complement(101206...101421)   |
| 12 | 2250N | <i>Nostoc</i> sp PCC7120        | protein   | BA000019.2 | BAB73952.1 | gene=grpB             | protein=gas vesicle protein                                 | protein id=BAB73952.1 | location=complement(2706132...2706347) |
| 12 | 2251N | <i>Nostoc</i> sp PCC7120        | protein   | BA000019.2 | BAB73953.1 | gene=grpA             | protein=gas vesicle protein                                 | protein id=BAB73953.1 | location=complement(2706452...2706667) |
| 14 | 375A  | <i>Microcystis aeruginosa</i>   | NIES-843  | AP009552.1 | BAG03580.1 | gene=grpA             | protein=gas vesicle protein GvpAI                           | protein id=BAG03580.1 | location=339385...3399600              |
| 14 | 3755A | <i>Microcystis aeruginosa</i>   | NIES-843  | AP009552.1 | BAG03581.1 | gene=grpAII           | protein=gas vesicle protein GvpAII                          | protein id=BAG03581.1 | location=3399955...3400170             |
| 14 | 3756A | <i>Microcystis aeruginosa</i>   | NIES-843  | AP009552.1 | BAG03582.1 | gene=grpAIII          | protein=gas vesicle protein GvpAIII                         | protein id=BAG03582.1 | location=3400500...3400715             |
| 5  | 1438A | <i>Anabaena variabilis</i>      | ATCC29413 | CP000117.1 | ABA21064.1 | gene=Ava 1441         | protein=transposase, IS4 family                             | protein id=ABA21064.1 | location=1783089...1783529             |
| 5  | 2475A | <i>Anabaena variabilis</i>      | ATCC29413 | CP000117.1 | ABA22101.1 | gene=Ava 2486         | protein=transposase, IS4 family                             | protein id=ABA22101.1 | location=complement(3082253...3082642) |
| 12 | 15N   | <i>Nostoc</i> sp PCC7120        | protein   | BA000019.2 | BAB77539.1 | gene=al10015          | protein=transposase                                         | protein id=BAB77539.1 | location=complement(12738...13168)     |
| 12 | 3607N | <i>Nostoc</i> sp PCC7120        | protein   | BA000019.2 | BAB75310.1 | gene=al3611           | protein=transposase                                         | protein id=BAB75310.1 | location=4361477...4361917             |
| 12 | 4394N | <i>Nostoc</i> sp PCC7120        | protein   | BA000019.2 | BAB76098.1 | gene=al14399          | protein=transposase                                         | protein id=BAB76098.1 | location=complement(5275721...5276161) |
| 12 | 443AN | <i>Nostoc</i> sp PCC7120        | protein   | BA000019.2 | BAB76138.1 | gene=al4439           | protein=transposase                                         | protein id=BAB76138.1 | location=5322723...5323163             |
| 12 | 4811N | <i>Nostoc</i> sp PCC7120        | protein   | BA000019.2 | BAB76515.1 | gene=al14816          | protein=transposase                                         | protein id=BAB76515.1 | location=complement(5735451...5735891) |
| 12 | 5153N | <i>Nostoc</i> sp PCC7120        | protein   | BA000019.2 | BAB76857.1 | gene=al5158           | protein=transposase                                         | protein id=BAB76857.1 | location=6157112...6157552             |
| 15 | 1014N | <i>Nostoc azollae</i>           | 0708      | CP002059.1 | ADI63683.1 | gene=Aazo 1465        | protein=transposase IS4 family protein                      | protein id=ADI63683.1 | location=complement(1532502...1532957) |
| 15 | 1308N | <i>Nostoc azollae</i>           | 0708      | CP002059.1 | ADI63977.1 | gene=Aazo 1882        | protein=transposase IS4 family protein                      | protein id=ADI63977.1 | location=complement(1955990...1956445) |
| 15 | 1612N | <i>Nostoc azollae</i>           | 0708      | CP002059.1 | ADI64281.1 | gene=Aazo 2318        | protein=transposase IS4 family protein                      | protein id=ADI64281.1 | location=complement(2406642...2407097) |

|    |                  |           |          |            |            |              |                                                  |                       |                                       |
|----|------------------|-----------|----------|------------|------------|--------------|--------------------------------------------------|-----------------------|---------------------------------------|
| 8  | 1184Synecococcus | sp        | JA-3-3Ab | BA000045.2 | BAC89125.1 | gene=cpcB    | protein=phycocyanin beta chain                   | protein id=BAC89125.1 | location=1263334..1263852             |
|    | protein          |           |          |            |            |              |                                                  |                       |                                       |
| 8  | 3216Synecococcus | sp        | JA-3-3Ab | BA000045.2 | BAC91158.1 | gene=cpcB    | protein=phycocyanin beta chain                   | protein id=BAC91158.1 | location=3424755..3425273             |
|    | protein          |           |          |            |            |              |                                                  |                       |                                       |
| 18 | 496Synecococcus  | elongatus |          | AF008231.1 | BAD78686.1 | gene=cpcB    | protein=phycocyanin beta subunit                 | protein id=BAD78686.1 | location=complement(556210..556731)   |
|    | PC06301          | protein   |          |            |            |              |                                                  |                       |                                       |
| 18 | 301Synecococcus  | elongatus |          | AF008231.1 | BAD78691.1 | gene=cpcB    | protein=phycocyanin beta subunit                 | protein id=BAD78691.1 | location=complement(559965..560486)   |
|    | PC06301          | protein   |          |            |            |              |                                                  |                       |                                       |
| 19 | 1184Gloeobacter  | violaceus |          | BA000045.2 | BAC89125.1 | gene=cpcB    | protein=phycocyanin beta chain                   | protein id=BAC89125.1 | location=1263334..1263852             |
|    | PCC7421          | protein   |          |            |            |              |                                                  |                       |                                       |
| 19 | 3216Gloeobacter  | violaceus |          | BA000045.2 | BAC91158.1 | gene=cpcB    | protein=phycocyanin beta chain                   | protein id=BAC91158.1 | location=3424755..3425273             |
|    | PCC7421          | protein   |          |            |            |              |                                                  |                       |                                       |
| 8  | 1185Synecococcus | sp        | JA-3-3Ab | BA000045.2 | BAC89126.1 | gene=cpcA    | protein=phycocyanin alpha chain                  | protein id=BAC89126.1 | location=1263891..1264379             |
|    | protein          |           |          |            |            |              |                                                  |                       |                                       |
| 8  | 3217Synecococcus | sp        | JA-3-3Ab | BA000045.2 | BAC91159.1 | gene=cpcA    | protein=phycocyanin alpha chain                  | protein id=BAC91159.1 | location=3425312..3425800             |
|    | protein          |           |          |            |            |              |                                                  |                       |                                       |
| 18 | 495Synecococcus  | elongatus |          | AF008231.1 | BAD78685.1 | gene=cpcA    | protein=phycocyanin alpha subunit                | protein id=BAD78685.1 | location=complement(555667..556158)   |
|    | PC06301          | protein   |          |            |            |              |                                                  |                       |                                       |
| 18 | 300Synecococcus  | elongatus |          | AF008231.1 | BAD78690.1 | gene=cpcA    | protein=phycocyanin alpha subunit                | protein id=BAD78690.1 | location=complement(559422..559913)   |
|    | PC06301          | protein   |          |            |            |              |                                                  |                       |                                       |
| 19 | 1185Gloeobacter  | violaceus |          | BA000045.2 | BAC89126.1 | gene=cpcA    | protein=phycocyanin alpha chain                  | protein id=BAC89126.1 | location=1263891..1264379             |
|    | PCC7421          | protein   |          |            |            |              |                                                  |                       |                                       |
| 19 | 3217Gloeobacter  | violaceus |          | BA000045.2 | BAC91159.1 | gene=cpcA    | protein=phycocyanin alpha chain                  | protein id=BAC91159.1 | location=3425312..3425800             |
|    | PCC7421          | protein   |          |            |            |              |                                                  |                       |                                       |
| 8  | 146Synecococcus  | sp        | JA-3-3Ab | BA000045.2 | BAC88087.1 | gene=cpcA    | protein=phycocyanin alpha chain                  | protein id=BAC88087.1 | location=137192..138595               |
|    | protein          |           |          |            |            |              |                                                  |                       |                                       |
| 8  | 371Synecococcus  | sp        | JA-3-3Ab | BA000045.2 | BAC88312.1 | gene=gHr0146 | protein=gHr0146                                  | protein id=BAC88312.1 | location=complement(385225..386628)   |
|    | protein          |           |          |            |            |              |                                                  |                       |                                       |
| 19 | 146Gloeobacter   | violaceus | PCC7421  | BA000045.2 | BAC88087.1 | gene=gHr0146 | protein=gHr0146                                  | protein id=BAC88087.1 | location=137192..138595               |
|    | protein          |           |          |            |            |              |                                                  |                       |                                       |
| 19 | 371Gloeobacter   | violaceus | PCC7421  | BA000045.2 | BAC88312.1 | gene=gHr0371 | protein=gHr0371                                  | protein id=BAC88312.1 | location=complement(385225..386628)   |
|    | protein          |           |          |            |            |              |                                                  |                       |                                       |
| 8  | 1387Synecococcus | sp        | JA-3-3Ab | BA000045.2 | BAC89328.1 | gene=gHr1387 | protein=gHr1387                                  | protein id=BAC89328.1 | location=1491048..1491683             |
|    | protein          |           |          |            |            |              |                                                  |                       |                                       |
| 8  | 2402Synecococcus | sp        | JA-3-3Ab | BA000045.2 | BAC90343.1 | gene=gHr2402 | protein=MotA/TolQ/ExxB<br>proton channel protein | protein id=BAC90343.1 | location=2561704..2562339             |
|    | protein          |           |          |            |            |              | family                                           |                       |                                       |
| 19 | 1387Gloeobacter  | violaceus | PCC7421  | BA000045.2 | BAC89328.1 | gene=gHr1387 | protein=gHr1387                                  | protein id=BAC89328.1 | location=1491048..1491683             |
|    | protein          |           |          |            |            |              |                                                  |                       |                                       |
| 19 | 2402Gloeobacter  | violaceus | PCC7421  | BA000045.2 | BAC90343.1 | gene=gHr2402 | protein=MotA/TolQ/ExxB<br>proton channel protein | protein id=BAC90343.1 | location=2561704..2562339             |
|    | protein          |           |          |            |            |              | family                                           |                       |                                       |
| 8  | 1389Synecococcus | sp        | JA-3-3Ab | BA000045.2 | BAC89330.1 | gene=gHr1389 | protein=gHr1389                                  | protein id=BAC89330.1 | location=1492134..1492832             |
|    | protein          |           |          |            |            |              |                                                  |                       |                                       |
| 8  | 2404Synecococcus | sp        | JA-3-3Ab | BA000045.2 | BAC90345.1 | gene=gHr2404 | protein=gHr2404                                  | protein id=BAC90345.1 | location=2562721..2563491             |
|    | protein          |           |          |            |            |              |                                                  |                       |                                       |
| 19 | 1389Gloeobacter  | violaceus | PCC7421  | BA000045.2 | BAC89330.1 | gene=gHr1389 | protein=gHr1389                                  | protein id=BAC89330.1 | location=1492134..1492832             |
|    | protein          |           |          |            |            |              |                                                  |                       |                                       |
| 19 | 2404Gloeobacter  | violaceus | PCC7421  | BA000045.2 | BAC90345.1 | gene=gHr2404 | protein=gHr2404                                  | protein id=BAC90345.1 | location=2562721..2563491             |
|    | protein          |           |          |            |            |              |                                                  |                       |                                       |
| 8  | 2131Synecococcus | sp        | JA-3-3Ab | BA000045.2 | BAC90072.1 | gene=gHr2131 | protein=gHr2131                                  | protein id=BAC90072.1 | location=2283239..2283793             |
|    | protein          |           |          |            |            |              |                                                  |                       |                                       |
| 8  | 2563Synecococcus | sp        | JA-3-3Ab | BA000045.2 | BAC90504.1 | gene=gHr2563 | protein=gHr2563                                  | protein id=BAC90504.1 | location=complement(2715339..2715977) |
|    | protein          |           |          |            |            |              |                                                  |                       |                                       |
| 19 | 2131Gloeobacter  | violaceus | PCC7421  | BA000045.2 | BAC90072.1 | gene=gHr2131 | protein=gHr2131                                  | protein id=BAC90072.1 | location=2283239..2283793             |
|    | protein          |           |          |            |            |              |                                                  |                       |                                       |
| 19 | 2563Gloeobacter  | violaceus | PCC7421  | BA000045.2 | BAC90504.1 | gene=gHr2563 | protein=gHr2563                                  | protein id=BAC90504.1 | location=complement(2715339..2715977) |
|    | protein          |           |          |            |            |              |                                                  |                       |                                       |
| 8  | 3267Synecococcus | sp        | JA-3-3Ab | BA000045.2 | BAC91209.1 | gene=gHr3268 | protein=gHr3268                                  | protein id=BAC91209.1 | location=3470391..3470822             |
|    | protein          |           |          |            |            |              |                                                  |                       |                                       |
| 8  | 3346Synecococcus | sp        | JA-3-3Ab | BA000045.2 | BAC91288.1 | gene=gHr3347 | protein=gHr3347                                  | protein id=BAC91288.1 | location=complement(3553745..3554176) |
|    | protein          |           |          |            |            |              |                                                  |                       |                                       |
| 19 | 3267Gloeobacter  | violaceus | PCC7421  | BA000045.2 | BAC91209.1 | gene=gHr3268 | protein=gHr3268                                  | protein id=BAC91209.1 | location=3470391..3470822             |
|    | protein          |           |          |            |            |              |                                                  |                       |                                       |
| 19 | 3346Gloeobacter  | violaceus | PCC7421  | BA000045.2 | BAC91288.1 | gene=gHr3347 | protein=gHr3347                                  | protein id=BAC91288.1 | location=complement(3553745..3554176) |
|    | protein          |           |          |            |            |              |                                                  |                       |                                       |

|    |                                           |                       |               |                   |                       |                                       |
|----|-------------------------------------------|-----------------------|---------------|-------------------|-----------------------|---------------------------------------|
| 8  | 151Synecococcus sp JA-3-3Ab protein       | BA000045.2 BAC88092.1 | gene=g10151   | protein=g10151    | protein id=BAC88092.1 | location=complement(141822..143390)   |
| 8  | 006Synecococcus sp JA-3-3Ab protein       | BA000045.2 BAC88547.1 | gene=g10606   | protein=g10606    | protein id=BAC88547.1 | location=complement(649344..650912)   |
| 8  | 298ISynecococcus sp JA-3-3Ab protein      | BA000045.2 BAC90925.1 | gene=g12984   | protein=g12984    | protein id=BAC90925.1 | location=complement(3183107..3184675) |
| 8  | 383ISynecococcus sp JA-3-3Ab protein      | BA000045.2 BAC91777.1 | gene=g13836   | protein=g13836    | protein id=BAC91777.1 | location=complement(4039599..4041167) |
| 8  | 4320Synecococcus sp JA-3-3Ab protein      | BA000045.2 BAC92263.1 | gene=g1r4322  | protein=g1r4322   | protein id=BAC92263.1 | location=4553924..4555492             |
| 19 | 151Gloeobacter violaceus PCCT421 protein  | BA000045.2 BAC88092.1 | gene=g10151   | protein=g10151    | protein id=BAC88092.1 | location=complement(141822..143390)   |
| 19 | 606Gloeobacter violaceus PCCT421 protein  | BA000045.2 BAC88547.1 | gene=g10606   | protein=g10606    | protein id=BAC88547.1 | location=complement(649344..650912)   |
| 19 | 2984Gloeobacter violaceus PCCT421 protein | BA000045.2 BAC90925.1 | gene=g12984   | protein=g12984    | protein id=BAC90925.1 | location=complement(3183107..3184675) |
| 19 | 3834Gloeobacter violaceus PCCT421 protein | BA000045.2 BAC91777.1 | gene=g13836   | protein=g13836    | protein id=BAC91777.1 | location=complement(4039599..4041167) |
| 19 | 4320Gloeobacter violaceus PCCT421 protein | BA000045.2 BAC92263.1 | gene=g1r4322  | protein=g1r4322   | protein id=BAC92263.1 | location=4553924..4555492             |
| 8  | 469Synecococcus sp JA-3-3Ab protein       | BA000045.2 BAC88410.1 | gene=rfbA     | protein=g1r4322   | protein id=BAC88410.1 | location=502369..503244               |
| 8  | 1783Synecococcus sp JA-3-3Ab protein      | BA000045.2 BAC89724.1 | gene=g11783   | protein=g1r4322   | protein id=BAC89724.1 | location=complement(1897569..1898444) |
| 19 | 469Gloeobacter violaceus PCCT421 protein  | BA000045.2 BAC88410.1 | gene=rfbA     | protein=g11783    | protein id=BAC88410.1 | location=502369..503244               |
| 19 | 1783Gloeobacter violaceus PCCT421 protein | BA000045.2 BAC89724.1 | gene=g11783   | protein=g11783    | protein id=BAC89724.1 | location=complement(1897569..1898444) |
| 8  | 518Synecococcus sp JA-3-3Ab protein       | BA000045.2 BAC88459.1 | gene=g10518   | protein=g10518    | protein id=BAC88459.1 | location=complement(556855..557763)   |
| 8  | 2561Synecococcus sp JA-3-3Ab protein      | BA000045.2 BAC90502.1 | gene=g12561   | protein=g12561    | protein id=BAC90502.1 | location=complement(2714074..2714982) |
| 8  | 4190Synecococcus sp JA-3-3Ab protein      | BA000045.2 BAC92133.1 | gene=g1r4192  | protein=g1r4192   | protein id=BAC92133.1 | location=4387734..4388642             |
| 19 | 518Gloeobacter violaceus PCCT421 protein  | BA000045.2 BAC88459.1 | gene=g10518   | protein=g10518    | protein id=BAC88459.1 | location=complement(556855..557763)   |
| 19 | 2561Gloeobacter violaceus PCCT421 protein | BA000045.2 BAC90502.1 | gene=g12561   | protein=g12561    | protein id=BAC90502.1 | location=complement(2714074..2714982) |
| 19 | 4190Gloeobacter violaceus PCCT421 protein | BA000045.2 BAC92133.1 | gene=g1r4192  | protein=g1r4192   | protein id=BAC92133.1 | location=4387734..4388642             |
| 8  | 519Synecococcus sp JA-3-3Ab protein       | BA000045.2 BAC88460.1 | gene=g10519   | protein=g10519    | protein id=BAC88460.1 | location=complement(557792..558193)   |
| 8  | 2562Synecococcus sp JA-3-3Ab protein      | BA000045.2 BAC90503.1 | gene=g12562   | protein=g12562    | protein id=BAC90503.1 | location=complement(2715011..2715364) |
| 8  | 4189Synecococcus sp JA-3-3Ab protein      | BA000045.2 BAC92132.1 | gene=g1r4191  | protein=g1r4191   | protein id=BAC92132.1 | location=4387304..4387705             |
| 19 | 519Gloeobacter violaceus PCCT421 protein  | BA000045.2 BAC88460.1 | gene=g10519   | protein=g10519    | protein id=BAC88460.1 | location=complement(557792..558193)   |
| 19 | 2562Gloeobacter violaceus PCCT421 protein | BA000045.2 BAC90503.1 | gene=g12562   | protein=g12562    | protein id=BAC90503.1 | location=complement(2715011..2715364) |
| 19 | 4189Gloeobacter violaceus PCCT421 protein | BA000045.2 BAC92132.1 | gene=g1r4191  | protein=g1r4191   | protein id=BAC92132.1 | location=4387304..4387705             |
| 8  | 914Synecococcus sp JA-3-3Ab protein       | BA000045.2 BAC88855.1 | gene=g10914   | protein=g10914    | protein id=BAC88855.1 | location=complement(969401..969739)   |
| 8  | 1495Synecococcus sp JA-3-3Ab protein      | BA000045.2 BAC89436.1 | gene=g11495   | protein=g11495    | protein id=BAC89436.1 | location=complement(1608188..1608526) |
| 19 | 914Gloeobacter violaceus PCCT421 protein  | BA000045.2 BAC88855.1 | gene=g10914   | protein=g10914    | protein id=BAC88855.1 | location=complement(969401..969739)   |
| 19 | 1495Gloeobacter violaceus PCCT421 protein | BA000045.2 BAC89436.1 | gene=g11495   | protein=g11495    | protein id=BAC89436.1 | location=complement(1608188..1608526) |
| 8  | 1530Synecococcus sp JA-3-3Ab protein      | BA000045.2 BAC89471.1 | gene=g1r1530  | protein=g1r1530   | protein id=BAC89471.1 | location=1650902..1651885             |
| 8  | 2846Synecococcus sp JA-3-3Ab protein      | BA000045.2 BAC90787.1 | gene=g1r2846  | protein=g1r2846   | protein id=BAC90787.1 | location=3032535..3033518             |
| 19 | 1530Gloeobacter violaceus PCCT421 protein | BA000045.2 BAC89471.1 | gene=g1r1530  | protein=g1r1530   | protein id=BAC89471.1 | location=1650902..1651885             |
| 19 | 2846Gloeobacter violaceus PCCT421 protein | BA000045.2 BAC90787.1 | gene=g1r2846  | protein=g1r2846   | protein id=BAC90787.1 | location=3032535..3033518             |
| 5  | ATCC29413 protein                         | CP000117.1 ABA23972.1 | gene=Ava_4374 | protein=conserved | protein id=ABA23972.1 | location=5481965..5482207             |
| 5  | 4346Anabaena protein                      | CP000117.1 ABA23973.1 | gene=Ava_4375 | protein=conserved | protein id=ABA23973.1 | location=5482353..5482589             |
| 12 | 1930Nostoc sp PCCT120 protein             | BA000019.2 BAB73632.1 | gene=asl1933  | protein=asl1933   | protein id=BAB73632.1 | location=complement(2319911..2320144) |
| 12 | 1932Nostoc sp PCCT120 protein             | BA000019.2 BAB73634.1 | gene=asl1935  | protein=asl1935   | protein id=BAB73634.1 | location=complement(2320597..2320830) |

|                                                |                       |                   |                     |                       |                                       |
|------------------------------------------------|-----------------------|-------------------|---------------------|-----------------------|---------------------------------------|
| 7 42Synchocystis sp PCC6803 protein            | BA000022.2 BAA16620.1 | gene=sll1397      | protein=transposase | protein id=BAA16620.1 | location=complement(52260..53108)     |
| 7 348Synchocystis sp PCC6803 protein           | BA000022.2 BAA16927.1 | gene=sllr1075     | protein=transposase | protein id=BAA16927.1 | location=379065..379913               |
| 7 992Synchocystis sp PCC6803 protein           | BA000022.2 BAA17571.1 | gene=sllr1357     | protein=transposase | protein id=BAA17571.1 | location=1098323..1099171             |
| 7 1466Synchocystis sp PCC6803 protein          | BA000022.2 BAA18045.1 | gene=sll11998     | protein=transposase | protein id=BAA18045.1 | location=complement(1623723..1624571) |
| 7 2196Synchocystis sp PCC6803 protein          | BA000022.2 BAA10164.1 | gene=sllr0352     | protein=transposase | protein id=BAA10164.1 | location=2443999..2444847             |
| 7 2266Synchocystis sp PCC6803 protein          | BA000022.2 BAA10234.1 | gene=sllr0230     | protein=transposase | protein id=BAA10234.1 | location=2534106..2534954             |
| 7 2772Synchocystis sp PCC6803 protein          | BA000022.2 BAA10742.1 | gene=sllr0704     | protein=transposase | protein id=BAA10742.1 | location=3097436..3098284             |
| 7 3107Synchocystis sp PCC6803 protein          | BA000022.2 BAA18818.1 | gene=sll0431      | protein=transposase | protein id=BAA18818.1 | location=complement(3512315..3513163) |
| 14 742Microcystis aeruginosa NIES-843 protein  | AP009552.1 BAG00564.1 | gene=MAE 07420    | protein=transposase | protein id=BAG00564.1 | location=644876..645724               |
| 14 950Microcystis aeruginosa NIES-843 protein  | AP009552.1 BAG00773.1 | gene=MAE 09510    | protein=transposase | protein id=BAG00773.1 | location=complement(824160..825008)   |
| 14 1410Microcystis aeruginosa NIES-843 protein | AP009552.1 BAG01233.1 | gene=MAE 14110    | protein=transposase | protein id=BAG01233.1 | location=1255936..1256784             |
| 14 1441Microcystis aeruginosa NIES-843 protein | AP009552.1 BAG01264.1 | gene=MAE 14420    | protein=transposase | protein id=BAG01264.1 | location=1286000..1286848             |
| 14 2041Microcystis aeruginosa NIES-843 protein | AP009552.1 BAG01864.1 | gene=MAE 20420    | protein=transposase | protein id=BAG01864.1 | location=complement(1829857..1830705) |
| 14 2400Microcystis aeruginosa NIES-843 protein | AP009552.1 BAG02223.1 | gene=MAE 24010    | protein=transposase | protein id=BAG02223.1 | location=complement(2168310..2169158) |
| 14 2464Microcystis aeruginosa NIES-843 protein | AP009552.1 BAG02287.1 | gene=MAE 24650    | protein=transposase | protein id=BAG02287.1 | location=2228421..2229269             |
| 14 2819Microcystis aeruginosa NIES-843 protein | AP009552.1 BAG02642.1 | gene=MAE 28200    | protein=transposase | protein id=BAG02642.1 | location=complement(2567857..2568705) |
| 14 3227Microcystis aeruginosa NIES-843 protein | AP009552.1 BAG03052.1 | gene=MAE 32300    | protein=transposase | protein id=BAG03052.1 | location=2946333..2947181             |
| 14 3632Microcystis aeruginosa NIES-843 protein | AP009552.1 BAG03458.1 | gene=MAE 36360    | protein=transposase | protein id=BAG03458.1 | location=complement(3279361..3280209) |
| 14 3837Microcystis aeruginosa NIES-843 protein | AP009552.1 BAG03663.1 | gene=MAE 38410    | protein=transposase | protein id=BAG03663.1 | location=complement(3471789..3472637) |
| 14 3892Microcystis aeruginosa NIES-843 protein | AP009552.1 BAG03718.1 | gene=MAE 38960    | protein=transposase | protein id=BAG03718.1 | location=complement(3566138..3566986) |
| 14 4513Microcystis aeruginosa NIES-843 protein | AP009552.1 BAG04339.1 | gene=MAE 45170    | protein=transposase | protein id=BAG04339.1 | location=4154465..4155313             |
| 14 5113Microcystis aeruginosa NIES-843 protein | AP009552.1 BAG04937.1 | gene=MAE 51150    | protein=transposase | protein id=BAG04937.1 | location=4697263..4698111             |
| 14 5172Microcystis aeruginosa NIES-843 protein | AP009552.1 BAG04996.1 | gene=MAE 51740    | protein=transposase | protein id=BAG04996.1 | location=complement(4746045..4746893) |
| 14 5381Microcystis aeruginosa NIES-843 protein | AP009552.1 BAG05204.1 | gene=MAE 53820    | protein=transposase | protein id=BAG05204.1 | location=complement(4944696..4945544) |
| 14 5503Microcystis aeruginosa NIES-843 protein | AP009552.1 BAG05327.1 | gene=MAE 55050    | protein=transposase | protein id=BAG05327.1 | location=complement(5080677..5081525) |
| 14 5660Microcystis aeruginosa NIES-843 protein | AP009552.1 BAG05484.1 | gene=MAE 56620    | protein=transposase | protein id=BAG05484.1 | location=complement(5221132..5221980) |
| 14 5984Microcystis aeruginosa NIES-843 protein | AP009552.1 BAG05807.1 | gene=MAE 59850    | protein=transposase | protein id=BAG05807.1 | location=5513511..5514359             |
| 1 568Cyanothecae sp PCC8801 protein            | CP001287.1 ACK64675.1 | gene=PCC8801 0587 | protein=transposase | protein id=ACK64675.1 | location=615742..616155               |
| 1 813Cyanothecae sp PCC8801 protein            | CP001287.1 ACK64920.1 | gene=PCC8801 0839 | protein=transposase | protein id=ACK64920.1 | location=complement(878858..879271)   |
| 1 1294Cyanothecae sp PCC8801 protein           | CP001287.1 ACK65401.1 | gene=PCC8801 1338 | protein=transposase | protein id=ACK65401.1 | location=1393277..1393690             |
| 9 1699Cyanothecae sp PCC7424 protein           | CP001291.1 ACK68643.1 | gene=PCC7424 0173 | protein=transposase | protein id=ACK68643.1 | location=191551..191970               |
| 9 14000Cyanothecae sp PCC7424 protein          | CP001291.1 ACK69875.1 | gene=PCC7424 1431 | protein=transposase | protein id=ACK69875.1 | location=complement(1574976..1575395) |
| 9 2731Cyanothecae sp PCC7424 protein           | CP001291.1 ACK71206.1 | gene=PCC7424 2799 | protein=transposase | protein id=ACK71206.1 | location=3111086..3111505             |



|    |                                                |            |            |                    |                                                 |                       |                                       |
|----|------------------------------------------------|------------|------------|--------------------|-------------------------------------------------|-----------------------|---------------------------------------|
| 3  | 134TThermosynechococcus elongatus BP-1 protein | BA000039.2 | BAC07687.1 | gene=tlr0134       | protein=tlr0134                                 | protein id=BAC07687.1 | location=114353..115579               |
| 3  | 205TThermosynechococcus elongatus BP-1 protein | BA000039.2 | BAC07758.1 | gene=tl0205        | protein=tl0205                                  | protein id=BAC07758.1 | location=complement(185743..186915)   |
| 3  | 222TThermosynechococcus elongatus BP-1 protein | BA000039.2 | BAC07775.1 | gene=tl0222        | protein=tl0222                                  | protein id=BAC07775.1 | location=complement(202481..203653)   |
| 3  | 273TThermosynechococcus elongatus BP-1 protein | BA000039.2 | BAC07826.1 | gene=tlr0273       | protein=tlr0273                                 | protein id=BAC07826.1 | location=257476..258648               |
| 3  | 405TThermosynechococcus elongatus BP-1 protein | BA000039.2 | BAC07958.1 | gene=tlr0406       | protein=tlr0406                                 | protein id=BAC07958.1 | location=403394..404566               |
| 3  | 511TThermosynechococcus elongatus BP-1 protein | BA000039.2 | BAC08064.1 | gene=tl0512        | protein=tl0512                                  | protein id=BAC08064.1 | location=complement(508223..509395)   |
| 3  | 605TThermosynechococcus elongatus BP-1 protein | BA000039.2 | BAC08156.1 | gene=tl0604        | protein=tl0604                                  | protein id=BAC08156.1 | location=complement(611416..612588)   |
| 3  | 685TThermosynechococcus elongatus BP-1 protein | BA000039.2 | BAC08238.1 | gene=tl0687        | protein=tl0687                                  | protein id=BAC08238.1 | location=complement(706573..707799)   |
| 3  | 1125Thermosynechococcus elongatus BP-1 protein | BA000039.2 | BAC08679.1 | gene=tlr1127       | protein=tlr1127                                 | protein id=BAC08679.1 | location=1159903..1161090             |
| 3  | 130Thermosynechococcus elongatus BP-1 protein  | BA000039.2 | BAC08704.1 | gene=tl01152       | protein=tl01152                                 | protein id=BAC08704.1 | location=complement(1183861..1185033) |
| 3  | 1372Thermosynechococcus elongatus BP-1 protein | BA000039.2 | BAC08926.1 | gene=tl01374       | protein=tl01374                                 | protein id=BAC08926.1 | location=complement(1441028..1442200) |
| 3  | 2177Thermosynechococcus elongatus BP-1 protein | BA000039.2 | BAC09731.1 | gene=tlr2179       | protein=tlr2179                                 | protein id=BAC09731.1 | location=2263217..2264389             |
| 3  | 260Thermosynechococcus elongatus BP-1 protein  | BA000039.2 | BAC09734.1 | gene=tlr2182       | protein=tlr2182                                 | protein id=BAC09734.1 | location=2266280..2267452             |
| 3  | 267Thermosynechococcus elongatus BP-1 protein  | BA000039.2 | BAC09751.1 | gene=tlr2199       | protein=tlr2199                                 | protein id=BAC09751.1 | location=2283094..2284266             |
| 3  | 274Thermosynechococcus elongatus BP-1 protein  | BA000039.2 | BAC09928.1 | gene=tlr2376       | protein=tlr2376                                 | protein id=BAC09928.1 | location=2486239..2487411             |
| 3  | 1575Microcystis aeruginosa NIES-843 protein    | AP009552.1 | BAG01398.1 | gene=MAE_15760     | protein=transposase                             | protein id=BAG01398.1 | location=1415997..1417040             |
| 3  | 2940Microcystis aeruginosa NIES-843 protein    | AP009552.1 | BAG02765.1 | gene=MAE_29430     | protein=transposase                             | protein id=BAG02765.1 | location=2681481..2682524             |
| 3  | 3611Athrospira platensis NIES-39 protein       | AP011615.1 | BA191453.1 | gene=NIES39_304060 | protein=transposase                             | protein id=BA191453.1 | location=complement(3681424..3681828) |
| 3  | 5325Athrospira platensis NIES-39 protein       | AP011615.1 | BA193167.1 | gene=NIES39_N00560 | protein=transposase                             | protein id=BA193167.1 | location=5473561..5473965             |
| 9  | 1437Cyanothecae sp FCC7424 protein             | CP001291.1 | ACK69912.1 | gene=PCC7424_1476  | protein=transposase                             | protein id=ACK69912.1 | location=complement(1620393..1620800) |
| 6  | 1071Athrospira platensis NIES-39 protein       | AP011615.1 | BA18913.1  | gene=PCC7424_3282  | protein=transposase                             | protein id=ACK73630.1 | location=complement(5859213..5859620) |
| 6  | 5156Athrospira platensis NIES-39 protein       | AP011615.1 | BA192998.1 | gene=NIES39_C00430 | protein=hyposhical protein                      | protein id=BA18913.1  | location=complement(1065361..1066566) |
| 14 | 1122Microcystis aeruginosa NIES-843 protein    | AP009552.1 | BAG00945.1 | gene=NIES39_M01610 | protein=hyposhical protein                      | protein id=BA192998.1 | location=5245558..5246763             |
| 14 | 4916Microcystis aeruginosa NIES-843 protein    | AP009552.1 | BAG04740.1 | gene=MAE_11230     | protein=hyposhical protein                      | protein id=BAG00945.1 | location=complement(974280..975422)   |
| 1  | 623Cyanothecae sp PCC8801 protein              | CP001287.1 | ACK64730.1 | gene=MAE_49180     | protein=hyposhical protein                      | protein id=BAG04740.1 | location=4504901..4505998             |
| 1  | 1928Cyanothecae sp PCC8801 protein             | CP001287.1 | ACK66035.1 | gene=PCC8801_0643  | protein=transposase                             | protein id=ACK64730.1 | location=complement(670640..671638)   |
| 14 | 1070Microcystis aeruginosa NIES-843 protein    | AP009552.1 | BAG00893.1 | gene=PCC8801_1997  | protein=transposase                             | protein id=ACK66035.1 | location=2072306..2073304             |
| 14 | 1388Microcystis aeruginosa NIES-843 protein    | AP009552.1 | BAG01211.1 | gene=MAE_10710     | protein=transposase                             | protein id=BAG00893.1 | location=complement(918742..919740)   |
| 14 | 1970Microcystis aeruginosa NIES-843 protein    | AP009552.1 | BAG01802.1 | gene=MAE_19800     | protein=transposase                             | protein id=BAG01211.1 | location=1239551..1240408             |
| 14 | 2026Microcystis aeruginosa NIES-843 protein    | AP009552.1 | BAG01849.1 | gene=MAE_20270     | protein=transposase                             | protein id=BAG01802.1 | location=1775638..1776636             |
| 14 | 2223Microcystis aeruginosa NIES-843 protein    | AP009552.1 | BAG02046.1 | gene=MAE_22240     | protein=transposase and inactivated derivatives | protein id=BAG01849.1 | location=complement(1817962..1818960) |
| 14 | 2341Microcystis aeruginosa NIES-843 protein    | AP009552.1 | BAG02164.1 | gene=MAE_23420     | protein=transposase                             | protein id=BAG02046.1 | location=1994117..1994884             |
| 14 | 2740Microcystis aeruginosa NIES-843 protein    | AP009552.1 | BAG02572.1 | gene=MAE_27500     | protein=transposase                             | protein id=BAG02164.1 | location=2108561..2109559             |
| 14 | 2882Microcystis aeruginosa NIES-843 protein    | AP009552.1 | BAG02707.1 | gene=MAE_28850     | protein=transposase                             | protein id=BAG02572.1 | location=complement(2481279..2482277) |
| 14 | 3636Microcystis aeruginosa NIES-843 protein    | AP009552.1 | BAG03462.1 | gene=MAE_36400     | protein=transposase                             | protein id=BAG02707.1 | location=complement(2629909..2630907) |
| 14 | 4403Microcystis aeruginosa NIES-843 protein    | AP009552.1 | BAG04229.1 | gene=MAE_44070     | protein=transposase                             | protein id=BAG03462.1 | location=3282649..3283647             |
| 14 | 6154Microcystis aeruginosa NIES-843 protein    | AP009552.1 | BAG05977.1 | gene=MAE_61550     | protein=transposase                             | protein id=BAG04229.1 | location=complement(4060904..4061902) |
|    |                                                |            |            |                    |                                                 | protein id=BAG05977.1 | location=5699143..5700141             |

|                                                  |                       |                      |                                                        |                       |                                                               |
|--------------------------------------------------|-----------------------|----------------------|--------------------------------------------------------|-----------------------|---------------------------------------------------------------|
| 9 1181Cyanothecce sp PCC7424 protein             | CP001291.1 ACK69656.1 | gene=PCC7424<br>1208 | protein=Insertion element protein                      | protein id=ACK69656.1 | location=join(1322136..1322465..1322467..1322829)             |
| 9 2458Cyanothecce sp PCC7424 protein             | CP001291.1 ACK70933.1 | gene=PCC7424<br>2516 | protein=Insertion element protein                      | protein id=ACK70933.1 | location=join(2799135..2799464..2799466..2799828)             |
| 9 5076Cyanothecce sp PCC7424 protein             | CP001291.1 ACK73551.1 | gene=PCC7424<br>5203 | protein=Insertion element protein                      | protein id=ACK73551.1 | location=complement(join(5775088..5775450..5775452..5775781)) |
| 16 695Acharyochloris marina                      | CP000828.1 ABW25786.1 | gene=AM1 0742        | protein=IS1 transposase                                | protein id=ABW25786.1 | location=720392..721081                                       |
| 16 3378Acharyochloris marina                     | CP000828.1 ABW28467.1 | gene=AM1 3475        | protein=IS1 transposase                                | protein id=ABW28467.1 | location=complement(3510465..3511154)                         |
| 16 5827Acharyochloris marina                     | CP000828.1 ABW30914.1 | gene=AM1 5978        | protein=IS1 transposase                                | protein id=ABW30914.1 | location=6055468..6056157                                     |
| 1 1064Cyanothecce sp PCC8801 protein             | CP001287.1 ACK65171.1 | gene=AM1 4201        | protein=IS1 transposase                                | protein id=ACK65171.1 | location=complement(1157486..1158697)                         |
| 1 4021Cyanothecce sp PCC8801 protein             | CP001287.1 ACK68129.1 | gene=PCC8801<br>1098 | protein=transposase, IS605 OrfB family                 | protein id=ACK68129.1 | location=4404944..4406155                                     |
| 1 4249Cyanothecce sp PCC8801 protein             | CP001287.1 ACK68357.1 | gene=PCC8801<br>4201 | protein=transposase, IS605 OrfB family                 | protein id=ACK68357.1 | location=complement(4663329..4664540)                         |
| 1 4435Cyanothecce sp PCC8801 protein             | BA000039.2 BAC07810.1 | gene=tlr0257         | protein=tlr0257                                        | protein id=BAC07810.1 | location=241585..242763                                       |
| 3 257Thermosynechococcus elongatus BP-1 protein  | BA000039.2 BAC07953.1 | gene=tlr0401         | protein=tlr0401                                        | protein id=BAC07953.1 | location=397671..398849                                       |
| 3 400Thermosynechococcus elongatus BP-1 protein  | BA000039.2 BAC08932.1 | gene=tlr1380         | protein=tlr1380                                        | protein id=BAC08932.1 | location=1447751..1448929                                     |
| 3 1378Thermosynechococcus elongatus BP-1 protein | BA000039.2 BAC09790.1 | gene=tlr2238         | protein=tlr2238                                        | protein id=BAC09790.1 | location=2320881..2322059                                     |
| 3 2236Thermosynechococcus elongatus BP-1 protein | CP000828.1 ABW25309.1 | gene=AM1 0223        | protein=transposase                                    | protein id=ABW25309.1 | location=complement(219734..221044)                           |
| 16 218Acharyochloris marina                      | CP000828.1 ABW25587.1 | gene=AM1 0535        | protein=transposase                                    | protein id=ABW25587.1 | location=515940..517250                                       |
| 16 496Acharyochloris marina                      | CP000828.1 ABW25728.1 | gene=AM1 0681        | protein=transposase                                    | protein id=ABW25728.1 | location=666645..667955                                       |
| 16 637Acharyochloris marina                      | CP000828.1 ABW26007.1 | gene=AM1 0965        | protein=transposase                                    | protein id=ABW26007.1 | location=940229..941539                                       |
| 16 916Acharyochloris marina                      | CP000828.1 ABW26164.1 | gene=AM1 1125        | protein=transposase                                    | protein id=ABW26164.1 | location=1100397..1101707                                     |
| 16 1073Acharyochloris marina                     | CP000828.1 ABW26945.1 | gene=AM1 1927        | protein=transposase                                    | protein id=ABW26945.1 | location=complement(1922983..1924293)                         |
| 16 1854Acharyochloris marina                     | CP000828.1 ABW27406.1 | gene=AM1 2396        | protein=transposase                                    | protein id=ABW27406.1 | location=complement(2402873..2404183)                         |
| 16 2315Acharyochloris marina                     | CP000828.1 ABW27597.1 | gene=AM1 2590        | protein=transposase                                    | protein id=ABW27597.1 | location=2629004..2630314                                     |
| 16 2506Acharyochloris marina                     | CP000828.1 ABW27600.1 | gene=AM1 2593        | protein=transposase                                    | protein id=ABW27600.1 | location=complement(2631483..2632793)                         |
| 16 2509Acharyochloris marina                     | CP000828.1 ABW28619.1 | gene=AM1 3629        | protein=transposase                                    | protein id=ABW28619.1 | location=complement(3687534..3688844)                         |
| 16 3530Acharyochloris marina                     | CP000828.1 ABW28691.1 | gene=AM1 3701        | protein=transposase                                    | protein id=ABW28691.1 | location=complement(3758553..3759863)                         |
| 16 3602Acharyochloris marina                     | CP000828.1 ABW28909.1 | gene=AM1 3924        | protein=transposase                                    | protein id=ABW28909.1 | location=3975226..3976536                                     |
| 16 3821Acharyochloris marina                     | CP000828.1 ABW29211.1 | gene=AM1 4231        | protein=transposase                                    | protein id=ABW29211.1 | location=4250628..4251938                                     |
| 16 4123Acharyochloris marina                     | CP000828.1 ABW30139.1 | gene=AM1 5177        | protein=transposase                                    | protein id=ABW30139.1 | location=complement(5241022..5242332)                         |
| 16 5052Acharyochloris marina                     | CP000828.1 ABW30247.1 | gene=AM1 5286        | protein=transposase                                    | protein id=ABW30247.1 | location=5352546..5353856                                     |
| 16 5160Acharyochloris marina                     | CP000828.1 ABW30626.1 | gene=AM1 5679        | protein=transposase                                    | protein id=ABW30626.1 | location=complement(5743964..5745274)                         |
| 16 5539Acharyochloris marina                     | CP000828.1 ABW31193.1 | gene=AM1 6261        | protein=transposase                                    | protein id=ABW31193.1 | location=complement(6336950..6338260)                         |
| 16 6106Acharyochloris marina                     | CP001037.1 ACC81227.1 | gene=Npun F2690      | protein=Transposase-like protein                       | protein id=ACC81227.1 | location=3341372..3342682                                     |
| 17 2423Nostoc punctiforme PCC73102 protein       | CP001037.1 ACC81643.1 | gene=Npun F3186      | protein=Transposase-like protein                       | protein id=ACC81643.1 | location=3966579..3967889                                     |
| 17 2839Nostoc punctiforme PCC73102 protein       | CP001037.1 ACC81778.1 | gene=Npun F3348      | protein=Transposase-like protein                       | protein id=ACC81778.1 | location=4168700..4170010                                     |
| 17 2974Nostoc punctiforme PCC73102 protein       | CP001037.1 ACC83796.1 | gene=Npun F5490      | protein=Transposase-like protein                       | protein id=ACC83796.1 | location=6779978..6781288                                     |
| 17 4991Nostoc punctiforme PCC73102 protein       | CP001287.1 ACK65860.1 | gene=PCC8801<br>1816 | protein=transposase, IS204/IS1001/IS1096/IS1165 family | protein id=ACK65860.1 | location=complement(1898016..1899242)                         |
| 1 1753Cyanothecce sp PCC8801 protein             | CP001287.1 ACK67474.1 | gene=PCC8801<br>3509 | protein=transposase, IS204/IS1001/IS1096/IS1165 family | protein id=ACK67474.1 | location=3661150..3662376                                     |
| 1 3865Cyanothecce sp PCC8801 protein             | CP001287.1 ACK67973.1 | gene=PCC8801<br>4034 | protein=transposase, IS204/IS1001/IS1096/IS1165 family | protein id=ACK67973.1 | location=complement(4225337..4226563)                         |
| 14 2469Microcystis aeruginosa NIES-843 protein   | AP009552.1 BAG02292.1 | gene=MAE 24700       | protein=transposase                                    | protein id=BAG02292.1 | location=complement(2233792..2234811)                         |
| 14 2696Microcystis aeruginosa NIES-843 protein   | AP009552.1 BAG02519.1 | gene=MAE 26970       | protein=transposase                                    | protein id=BAG02519.1 | location=complement(2436880..2438094)                         |

|     |                                                                                                                                                                                                                                                                 |                 |            |            |                       |                                          |                       |                                                              |
|-----|-----------------------------------------------------------------------------------------------------------------------------------------------------------------------------------------------------------------------------------------------------------------|-----------------|------------|------------|-----------------------|------------------------------------------|-----------------------|--------------------------------------------------------------|
| 6   | 1824A <throspira platensis<="" th=""> <td>NIES-39</td> <td>AP011615.1</td> <td>BAIS9666.1</td> <td>gene=NIDS39<br/>D02460</td> <td>protein=putative transposase</td> <td>protein_id=BAIS9666.1</td> <td>location=complement(1848140..1848499)</td> </throspira> | NIES-39         | AP011615.1 | BAIS9666.1 | gene=NIDS39<br>D02460 | protein=putative transposase             | protein_id=BAIS9666.1 | location=complement(1848140..1848499)                        |
| 6   | 4845A <throspira platensis<="" th=""> <td>NIES-39</td> <td>AP011615.1</td> <td>BAI92687.1</td> <td>gene=NIDS39<br/>L05300</td> <td>protein=putative transposase</td> <td>protein_id=BAI92687.1</td> <td>location=4909208..4909567</td> </throspira>             | NIES-39         | AP011615.1 | BAI92687.1 | gene=NIDS39<br>L05300 | protein=putative transposase             | protein_id=BAI92687.1 | location=4909208..4909567                                    |
| 16  | 451A <tharyochloris< th=""> <td>marina</td> <td>CP000828.1</td> <td>ABW25542.1</td> <td>gene=AMI_0489</td> <td>protein=transposase, putative</td> <td>protein_id=ABW25542.1</td> <td>location=469018..469401</td> </tharyochloris<>                             | marina          | CP000828.1 | ABW25542.1 | gene=AMI_0489         | protein=transposase, putative            | protein_id=ABW25542.1 | location=469018..469401                                      |
| 16  | 463A <tharyochloris< th=""> <td>marina</td> <td>CP000828.1</td> <td>ABW25544.1</td> <td>gene=AMI_0501</td> <td>protein=transposase, putative</td> <td>protein_id=ABW25544.1</td> <td>location=complement(477589..477972)</td> </tharyochloris<>                 | marina          | CP000828.1 | ABW25544.1 | gene=AMI_0501         | protein=transposase, putative            | protein_id=ABW25544.1 | location=complement(477589..477972)                          |
| 16  | 2017A <tharyochloris< th=""> <td>marina</td> <td>CP000828.1</td> <td>ABW27108.1</td> <td>gene=AMI_2093</td> <td>protein=transposase, putative</td> <td>protein_id=ABW27108.1</td> <td>location=2085736..2086095</td> </tharyochloris<>                          | marina          | CP000828.1 | ABW27108.1 | gene=AMI_2093         | protein=transposase, putative            | protein_id=ABW27108.1 | location=2085736..2086095                                    |
| 843 | MBIC11017 protein                                                                                                                                                                                                                                               | NIES-39         | AP009552.1 | BAG00334.1 | gene=MAE_05120        | protein=transposase                      | protein_id=BAG00334.1 | location=456375..457418                                      |
| 843 | MBIC11017 protein                                                                                                                                                                                                                                               | NIES-39         | AP009552.1 | BAG00570.1 | gene=MAE_07480        | protein=transposase                      | protein_id=BAG00570.1 | location=649201..650244                                      |
| 843 | MBIC11017 protein                                                                                                                                                                                                                                               | NIES-39         | AP009552.1 | BAG00853.1 | gene=MAE_10310        | protein=transposase                      | protein_id=BAG00853.1 | location=complement(884964..886007)                          |
| 843 | MBIC11017 protein                                                                                                                                                                                                                                               | NIES-39         | AP009552.1 | BAG04622.1 | gene=MAE_48000        | protein=transposase                      | protein_id=BAG04622.1 | location=4401177..4402220                                    |
| 16  | 1214A <tharyochloris< th=""> <td>marina</td> <td>CP000828.1</td> <td>ABW25215.1</td> <td>gene=AMI_0129</td> <td>protein=hypothetical protein</td> <td>protein_id=ABW25215.1</td> <td>location=complement(128563..129672)</td> </tharyochloris<>                 | marina          | CP000828.1 | ABW25215.1 | gene=AMI_0129         | protein=hypothetical protein             | protein_id=ABW25215.1 | location=complement(128563..129672)                          |
| 16  | 155A <tharyochloris< th=""> <td>marina</td> <td>CP000828.1</td> <td>ABW25246.1</td> <td>gene=AMI_0160</td> <td>protein=hypothetical protein</td> <td>protein_id=ABW25246.1</td> <td>location=158975..160084</td> </tharyochloris<>                              | marina          | CP000828.1 | ABW25246.1 | gene=AMI_0160         | protein=hypothetical protein             | protein_id=ABW25246.1 | location=158975..160084                                      |
| 16  | 1273A <tharyochloris< th=""> <td>marina</td> <td>CP000828.1</td> <td>ABW26364.1</td> <td>gene=AMI_1330</td> <td>protein=hypothetical protein</td> <td>protein_id=ABW26364.1</td> <td>location=1313003..1314112</td> </tharyochloris<>                           | marina          | CP000828.1 | ABW26364.1 | gene=AMI_1330         | protein=hypothetical protein             | protein_id=ABW26364.1 | location=1313003..1314112                                    |
| 16  | 4169A <tharyochloris< th=""> <td>marina</td> <td>CP000828.1</td> <td>ABW29257.1</td> <td>gene=AMI_4277</td> <td>protein=hypothetical protein</td> <td>protein_id=ABW29257.1</td> <td>location=complement(4296768..4297877)</td> </tharyochloris<>               | marina          | CP000828.1 | ABW29257.1 | gene=AMI_4277         | protein=hypothetical protein             | protein_id=ABW29257.1 | location=complement(4296768..4297877)                        |
| 16  | 4971A <tharyochloris< th=""> <td>marina</td> <td>CP000828.1</td> <td>ABW30058.1</td> <td>gene=AMI_5094</td> <td>protein=hypothetical protein</td> <td>protein_id=ABW30058.1</td> <td>location=5147289..5148398</td> </tharyochloris<>                           | marina          | CP000828.1 | ABW30058.1 | gene=AMI_5094         | protein=hypothetical protein             | protein_id=ABW30058.1 | location=5147289..5148398                                    |
| 16  | 5777A <tharyochloris< th=""> <td>marina</td> <td>CP000828.1</td> <td>ABW30864.1</td> <td>gene=AMI_5926</td> <td>protein=hypothetical protein</td> <td>protein_id=ABW30864.1</td> <td>location=5992224..5993333</td> </tharyochloris<>                           | marina          | CP000828.1 | ABW30864.1 | gene=AMI_5926         | protein=hypothetical protein             | protein_id=ABW30864.1 | location=5992224..5993333                                    |
| 16  | 6105A <tharyochloris< th=""> <td>marina</td> <td>CP000828.1</td> <td>ABW31192.1</td> <td>gene=AMI_6260</td> <td>protein=hypothetical protein</td> <td>protein_id=ABW31192.1</td> <td>location=6335818..6336927</td> </tharyochloris<>                           | marina          | CP000828.1 | ABW31192.1 | gene=AMI_6260         | protein=hypothetical protein             | protein_id=ABW31192.1 | location=6335818..6336927                                    |
| 14  | 165M <i>icrocystis aeruginosa</i>                                                                                                                                                                                                                               | NIES-39         | AP009552.1 | BAF99986.1 | gene=MAE_01650        | protein=hypothetical protein             | protein_id=BAF99986.1 | location=133753..134526                                      |
| 14  | 3306M <i>icrocystis aeruginosa</i>                                                                                                                                                                                                                              | NIES-39         | AP009552.1 | BAG03133.1 | gene=MAE_33110        | protein=hypothetical protein             | protein_id=BAG03133.1 | location=complement(3016288..3017061)                        |
| 14  | 3422M <i>icrocystis aeruginosa</i>                                                                                                                                                                                                                              | NIES-39         | AP009552.1 | BAG03248.1 | gene=MAE_34260        | protein=hypothetical protein             | protein_id=BAG03248.1 | location=complement(3114659..3115432)                        |
| 14  | 4305M <i>icrocystis aeruginosa</i>                                                                                                                                                                                                                              | NIES-39         | AP009552.1 | BAG04131.1 | gene=MAE_43090        | protein=hypothetical protein             | protein_id=BAG04131.1 | location=3971211..3971984                                    |
| 17  | 1920N <i>ostoc punctiforme</i>                                                                                                                                                                                                                                  | PCC73102        | CP001037.1 | ACC80724.1 | gene=Npun_F2107       | protein=conserved hypothetical protein   | protein_id=ACC80724.1 | location=2576706..2577554                                    |
| 17  | 4319N <i>ostoc punctiforme</i>                                                                                                                                                                                                                                  | PCC73102        | CP001037.1 | ACC83123.1 | gene=Npun_R4774       | protein=conserved hypothetical protein   | protein_id=ACC83123.1 | location=complement(5915257..5916105)                        |
| 9   | 3766C <i>yanotheca sp</i>                                                                                                                                                                                                                                       | PCC7424 protein | CP001291.1 | ACK72241.1 | gene=PCC7424<br>3862  | protein=hypothetical protein             | protein_id=ACK72241.1 | location=complement(join(4297108..4297866,4297868..4297930)) |
| 9   | 3802C <i>yanotheca sp</i>                                                                                                                                                                                                                                       | PCC7424 protein | CP001291.1 | ACK72277.1 | gene=PCC7424<br>3899  | protein=transposase IS702 family protein | protein_id=ACK72277.1 | location=4332844..4333587                                    |

|                                                |                       |                |                               |                       |                                       |
|------------------------------------------------|-----------------------|----------------|-------------------------------|-----------------------|---------------------------------------|
| 14_484Microcystis aeruginosa NIES-843 protein  | AP009552.1 BAG00306.1 | gene=MAE 04840 | protein=transposase           | protein id=BAG00306.1 | location=431565..432356               |
| 14_783Microcystis aeruginosa NIES-843 protein  | AP009552.1 BAG00605.1 | gene=MAE 07830 | protein=transposase           | protein id=BAG00605.1 | location=679549..680406               |
| 14_895Microcystis aeruginosa NIES-843 protein  | AP009552.1 BAG00718.1 | gene=MAE 08960 | protein=transposase           | protein id=BAG00718.1 | location=778709..779566               |
| 14_928Microcystis aeruginosa NIES-843 protein  | AP009552.1 BAG00751.1 | gene=MAE 09290 | protein=transposase           | protein id=BAG00751.1 | location=803601..804458               |
| 14_990Microcystis aeruginosa NIES-843 protein  | AP009552.1 BAG00813.1 | gene=MAE 09910 | protein=transposase           | protein id=BAG00813.1 | location=complement(859757..860614)   |
| 14_1086Microcystis aeruginosa NIES-843 protein | AP009552.1 BAG00909.1 | gene=MAE 10870 | protein=transposase           | protein id=BAG00909.1 | location=complement(933528..934385)   |
| 14_2071Microcystis aeruginosa NIES-843 protein | AP009552.1 BAG01894.1 | gene=MAE 20720 | protein=transposase           | protein id=BAG01894.1 | location=1848286..1849143             |
| 14_2319Microcystis aeruginosa NIES-843 protein | AP009552.1 BAG02142.1 | gene=MAE 23200 | protein=transposase           | protein id=BAG02142.1 | location=2084969..2085826             |
| 14_2606Microcystis aeruginosa NIES-843 protein | AP009552.1 BAG02429.1 | gene=MAE 26070 | protein=transposase           | protein id=BAG02429.1 | location=complement(2356803..2357660) |
| 14_2710Microcystis aeruginosa NIES-843 protein | AP009552.1 BAG02533.1 | gene=MAE 27110 | protein=transposase           | protein id=BAG02533.1 | location=complement(2448484..2449323) |
| 14_3525Microcystis aeruginosa NIES-843 protein | AP009552.1 BAG03152.1 | gene=MAE 33300 | protein=transposase           | protein id=BAG03152.1 | location=complement(3028164..3029021) |
| 14_3560Microcystis aeruginosa NIES-843 protein | AP009552.1 BAG03187.1 | gene=MAE 33650 | protein=transposase           | protein id=BAG03187.1 | location=3065824..3066591             |
| 14_3439Microcystis aeruginosa NIES-843 protein | AP009552.1 BAG03265.1 | gene=MAE 34430 | protein=transposase           | protein id=BAG03265.1 | location=complement(3127634..3128401) |
| 14_3839Microcystis aeruginosa NIES-843 protein | AP009552.1 BAG03665.1 | gene=MAE 38430 | protein=transposase           | protein id=BAG03665.1 | location=3473455..3474312             |
| 14_3927Microcystis aeruginosa NIES-843 protein | AP009552.1 BAG03753.1 | gene=MAE 39310 | protein=transposase           | protein id=BAG03753.1 | location=3616333..3617190             |
| 14_3986Microcystis aeruginosa NIES-843 protein | AP009552.1 BAG03812.1 | gene=MAE 39900 | protein=transposase           | protein id=BAG03812.1 | location=3663197..3664054             |
| 14_4266Microcystis aeruginosa NIES-843 protein | AP009552.1 BAG04092.1 | gene=MAE 42700 | protein=transposase           | protein id=BAG04092.1 | location=complement(3938799..3939656) |
| 14_4843Microcystis aeruginosa NIES-843 protein | AP009552.1 BAG04667.1 | gene=MAE 48450 | protein=transposase           | protein id=BAG04667.1 | location=4447164..4448021             |
| 14_5305Microcystis aeruginosa NIES-843 protein | AP009552.1 BAG05128.1 | gene=MAE 53060 | protein=transposase           | protein id=BAG05128.1 | location=complement(4868782..4869639) |
| 14_5415Microcystis aeruginosa NIES-843 protein | AP009552.1 BAG05239.1 | gene=MAE 54170 | protein=transposase           | protein id=BAG05239.1 | location=complement(4978973..4979830) |
| 14_5690Microcystis aeruginosa NIES-843 protein | AP009552.1 BAG05523.1 | gene=MAE 57010 | protein=transposase           | protein id=BAG05523.1 | location=5261959..5262816             |
| 14_6145Microcystis aeruginosa NIES-843 protein | AP009552.1 BAG05968.1 | gene=MAE 61460 | protein=transposase           | protein id=BAG05968.1 | location=complement(5692792..5693649) |
| 14_6233Microcystis aeruginosa NIES-843 protein | AP009552.1 BAG06056.1 | gene=MAE 62340 | protein=transposase           | protein id=BAG06056.1 | location=complement(5773659..5774516) |
| 14_6284Microcystis aeruginosa NIES-843 protein | AP009552.1 BAG06108.1 | gene=MAE 62860 | protein=transposase           | protein id=BAG06108.1 | location=5820820..5821677             |
| 14_1381Microcystis aeruginosa NIES-843 protein | AP009552.1 BAG01204.1 | gene=MAE 13820 | protein=transposase           | protein id=BAG01204.1 | location=1236257..1236883             |
| 14_2091Microcystis aeruginosa NIES-843 protein | AP009552.1 BAG01914.1 | gene=MAE 20920 | protein=transposase           | protein id=BAG01914.1 | location=complement(1867658..1868284) |
| 16_1185Acharyochloris MBIC11017 protein        | CP000828.1 ABW26276.1 | gene=AM1 1238  | protein=transposase, putative | protein id=ABW26276.1 | location=complement(1225141..1225770) |
| 16_4321Acharyochloris MBIC11017 protein        | CP000828.1 ABW29409.1 | gene=AM1 4432  | protein=transposase, putative | protein id=ABW29409.1 | location=complement(4460718..4461347) |
| 14_1453Microcystis aeruginosa NIES-843 protein | AP009552.1 BAF99966.1 | gene=MAE 01450 | protein=transposase           | protein id=BAF99966.1 | location=120122..120571               |
| 14_2092Microcystis aeruginosa NIES-843 protein | AP009552.1 BAG01915.1 | gene=MAE 20930 | protein=transposase           | protein id=BAG01915.1 | location=complement(1868347..1868796) |
| 16_716Acharyochloris MBIC11017 protein         | CP000828.1 ABW25807.1 | gene=AM1 0763  | protein=transposase, putative | protein id=ABW25807.1 | location=complement(741568..742089)   |
| 16_1481Acharyochloris MBIC11017 protein        | CP000828.1 ABW26572.1 | gene=AM1 1547  | protein=transposase, putative | protein id=ABW26572.1 | location=1528937..1529458             |
| 16_1545Acharyochloris MBIC11017 protein        | CP000828.1 ABW26636.1 | gene=AM1 1612  | protein=transposase, putative | protein id=ABW26636.1 | location=1584889..1585410             |

|                                                |                       |                   |                                                         |                       |                                       |
|------------------------------------------------|-----------------------|-------------------|---------------------------------------------------------|-----------------------|---------------------------------------|
| 12 3982Nostoc sp PCC7120 protein               | BA00019.2 EAB75685.1  | gene=al3986       | protein=transposase                                     | protein id=EAB75685.1 | location=complement(4801437..4802645) |
| 12 4100Nostoc sp PCC7120 protein               | BA00019.2 EAB75803.1  | gene=ah4104       | protein=transposase                                     | protein id=EAB75803.1 | location=0944752..0945960             |
| 14 530Microcystis aeruginosa NIES-843 protein  | AF009552.1 BAG00592.1 | gene=MAE_05300    | protein=transposase                                     | protein id=BAG00592.1 | location=471056..472243               |
| 14 4484Microcystis aeruginosa NIES-843 protein | AF009552.1 BAG04310.1 | gene=MAE_44880    | protein=transposase                                     | protein id=BAG04310.1 | location=complement(4126673..4127860) |
| 1 364Cyanothecae sp PCC8801 protein            | CP001287.1 ACK64471.1 | gene=PCC8801_0373 | protein=putative IS891/IS1136/IS1341 family transposase | protein id=ACK64471.1 | location=371253..372587               |
| 1 3436Cyanothecae sp PCC8801 protein           | CP001287.1 ACK67544.1 | gene=PCC8801_3581 | protein=putative IS891/IS1136/IS1341 family transposase | protein id=ACK67544.1 | location=complement(3730986..3732320) |
| 9 804Cyanothecae sp PCC7424 protein            | CP001291.1 ACK69278.1 | gene=PCC7424_0822 | protein=putative transposase IS605 family               | protein id=ACK69278.1 | location=complement(910819..912054)   |
| 9 3156Cyanothecae sp PCC7424 protein           | CP001291.1 ACK71631.1 | gene=PCC7424_3231 | protein=putative transposase IS605 family               | protein id=ACK71631.1 | location=3615830..3617065             |
