# Supplementary material for: Gene copy number variation and its significance in cyanobacterial phylogeny
Source: PubMed Central journal article supplement (PMC3552681; doi:10.1186/1471-2180-12-177), 2012-08-15
Supplement: 1471-2180-12-177-S2.pdf [file 1471-2180-12-177-S2.pdf]

| <b>species</b>                           | <b>Group</b> | <b># of 16S rRNA copies</b> |
|------------------------------------------|--------------|-----------------------------|
| Acharyochloris marina MBIC11017          | G1           | 2                           |
| Anabaena variabilis ATCC 29413           | G3           | 4                           |
| Arthrospira platensis NIES 39            | G1           | 2                           |
| Cyanothece sp. PCC 7424                  | G1           | 3                           |
| Cyanothece sp. PCC 8801                  | G1           | 2                           |
| Gloeobacter violaceus PCC 7421           | G0           | 1                           |
| Microcystis aeruginosa NIES-843          | G1           | 2                           |
| Nostoc azollae 0708                      | G3           | 4                           |
| Nostoc punctiforme PCC 73102             | G3           | 4                           |
| Nostoc sp. PCC 7120                      | G3           | 4                           |
| Prochlorococcus marinus str. MIT 9211    | G0           | 1                           |
| Prochlorococcus marinus str. MIT 9303    | G0           | 2                           |
| P. marinus subsp. pastoris str. CCMP1986 | G0           | 1                           |
| Synechococcus elongatus PCC 6301         | G1           | 2                           |
| Synechococcus sp. PCC 7002               | G1           | 2                           |
| Synechococcus sp. RCC307                 | G1           | 1                           |
| Synechococcus sp. WH 7803                | G1           | 2                           |
| Thermosynechococcus elongatus BP-1       | G1           | 1                           |
| Trichodesmium erythraeum IMS101          | G2           | 2                           |
| cyanobacterium UCYN-A                    | G0           | 2                           |
| Oscillatoria sp PCC 65061*               | G1           | 1                           |
| Aphanizomenon os-aquae PCC 79051*        | G3           | 5                           |
| Anabaenopsis PCC 92151*                  | G3           | 4                           |
| Anabaena os-aquae PCC 93021*             | G3           | 5                           |
| Nodularia PCC 93501*                     | G3           | 4                           |
| Anabaenopsis elenkinii PCC 94201*        | G3           | 4                           |
| Cyanospira rippkae PCC 95011*            | G3           | 4                           |
| Cyanospira capsulata PCC 95021*          | G3           | 4                           |
