# Supplementary material for: Gene copy number variation and its significance in cyanobacterial phylogeny
Source: PubMed Central journal article supplement (PMC3552681; doi:10.1186/1471-2180-12-177), 2012-08-15

16S rRNA gene (incl. additional data from rrndb)  $\rho=0.87$ ,  $R=0.902$

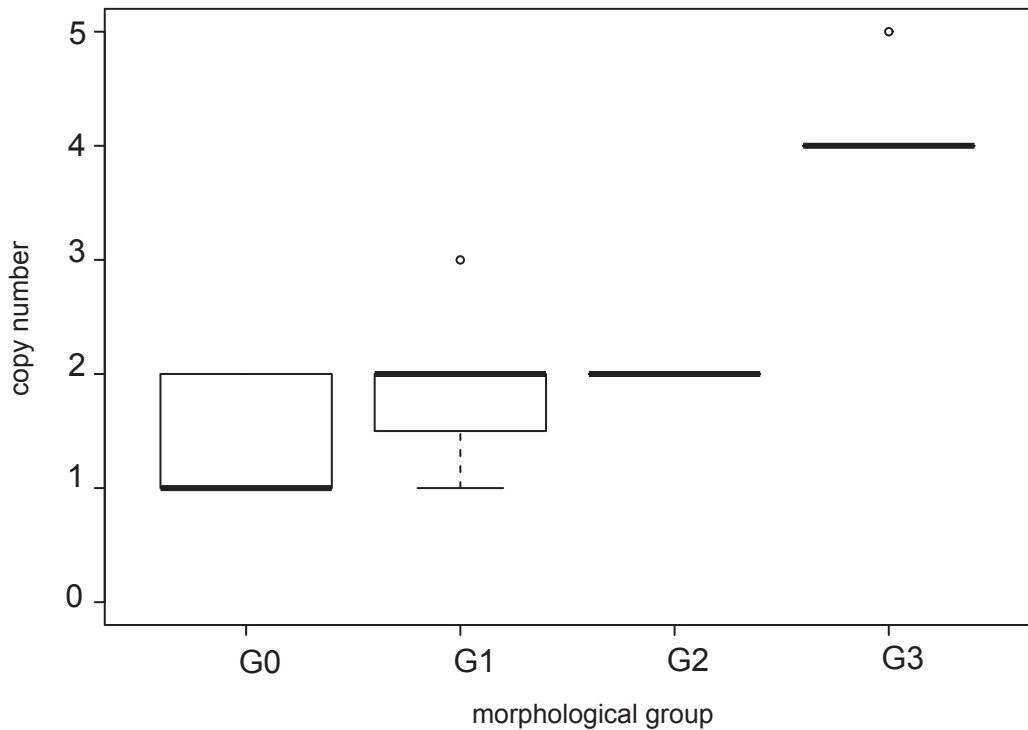

Supplement: 1471-2180-12-177-S3.pdf [file 1471-2180-12-177-S3.pdf]
