# Supplementary material for: Gene copy number variation and its significance in cyanobacterial phylogeny
Source: PubMed Central journal article supplement (PMC3552681; doi:10.1186/1471-2180-12-177), 2012-08-15

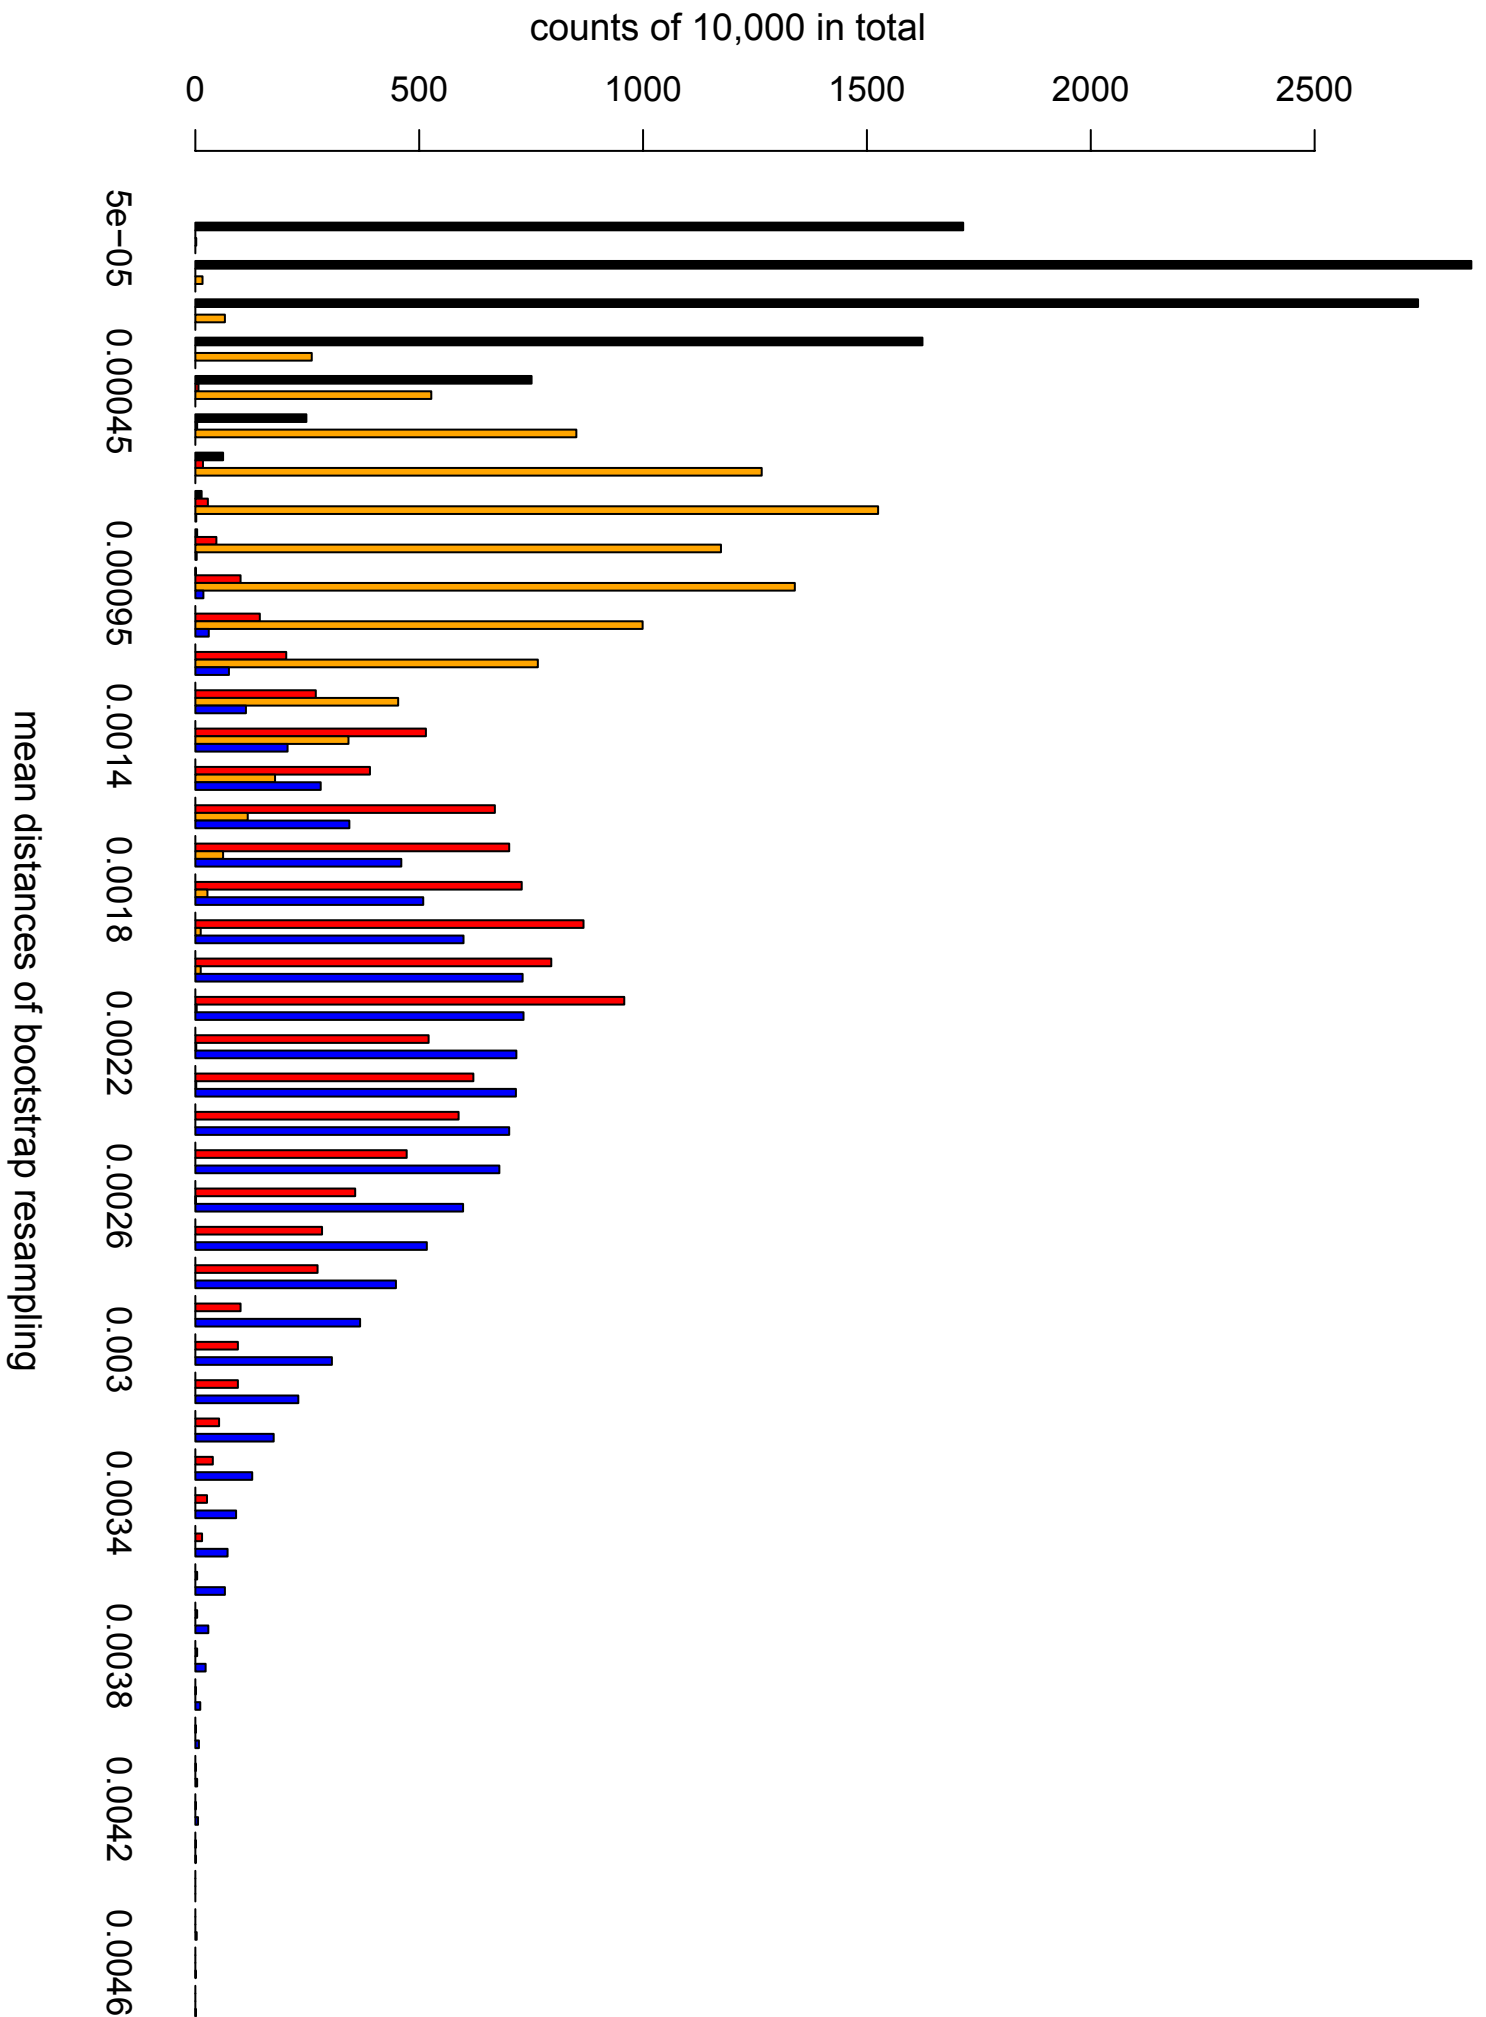

Supplement: 1471-2180-12-177-S4.pdf [file 1471-2180-12-177-S4.pdf]
