# Supplementary material for: Gene copy number variation and its significance in cyanobacterial phylogeny
Source: PubMed Central journal article supplement (PMC3552681; doi:10.1186/1471-2180-12-177), 2012-08-15

counts of 10,000 in total

0 50 100 150 200 250 300

mean distances of bootstrap sample

0.098 0.12 0.14 0.16 0.18 0.2 0.22 0.24 0.26 0.28 0.3 0.32 0.34 0.36 0.38 0.4 0.42

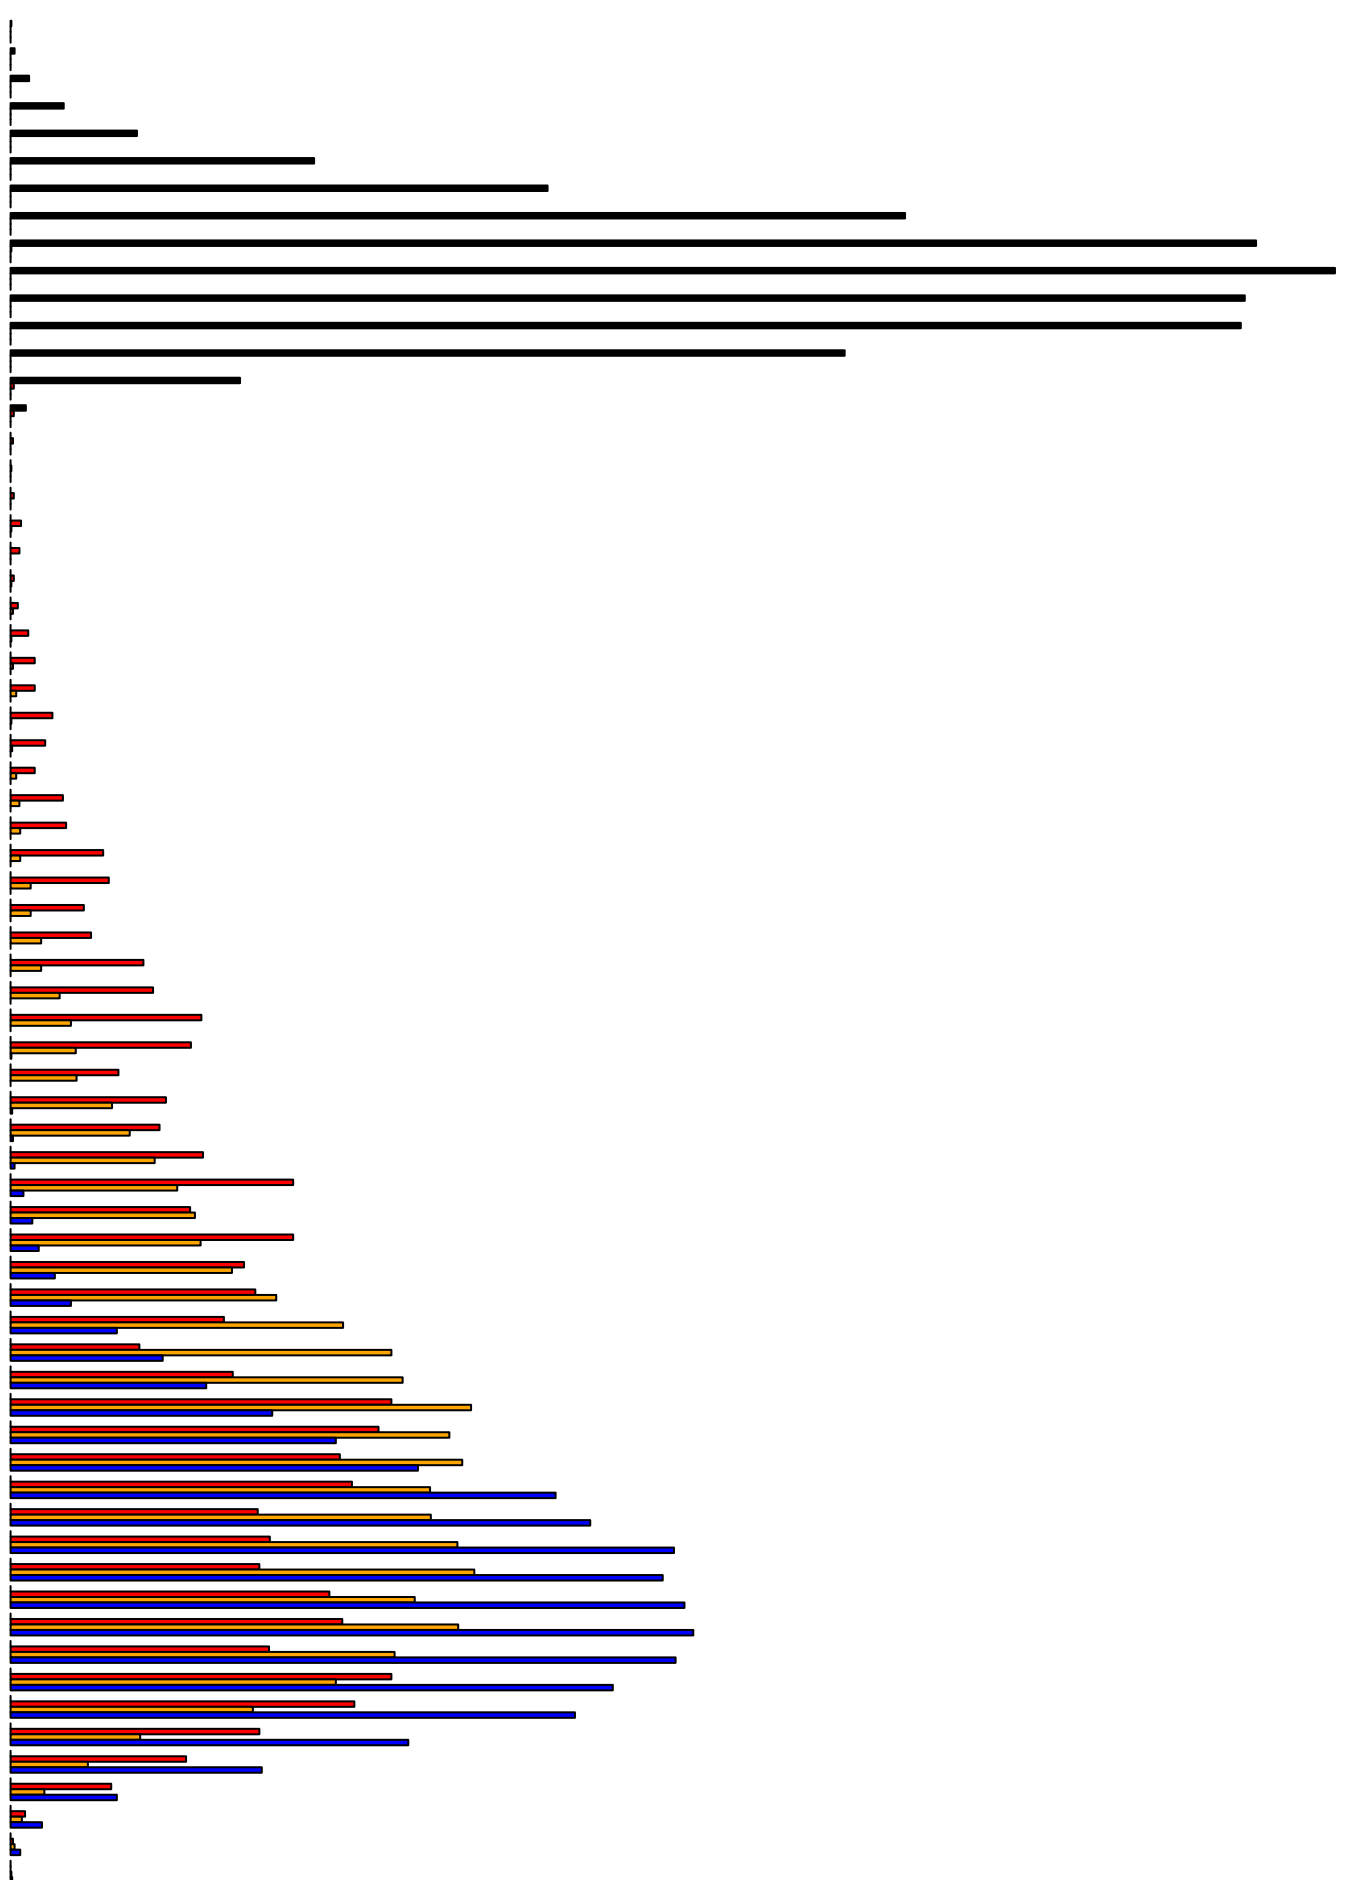

Supplement: 1471-2180-12-177-S5.pdf [file 1471-2180-12-177-S5.pdf]
