# Supplementary material for: Gene copy number variation and its significance in cyanobacterial phylogeny
Source: PubMed Central journal article supplement (PMC3552681; doi:10.1186/1471-2180-12-177), 2012-08-15
Supplement: 1471-2180-12-177-S10.pdf [file 1471-2180-12-177-S10.pdf]

| species                                                     | genome size | 16S rRNA copy numbers | accession numbers | species                                      | genome size | 16S rRNA copy numbers | accession numbers |
|-------------------------------------------------------------|-------------|-----------------------|-------------------|----------------------------------------------|-------------|-----------------------|-------------------|
| <b>Aquificae</b>                                            |             |                       |                   |                                              |             |                       |                   |
| <i>Aquifex aeolicus</i> VF5                                 | 1.6         | 2                     | AE000657.1        | <b>Bacteroidetes</b>                         |             |                       |                   |
| <i>Desulfurobacterium thermophilum</i> DSM 11699            | 1.5         | 2                     | CP002543.1        | <i>Alistipes shahali</i> WAL 8301            | 3.8         | 1                     | FF929402          |
| <i>Hydrogenobacter thermophilus</i> TK-6                    | 1.7         | 1                     | AP011121.1        | <i>Bacteroides fragilis</i> NCTC 4343        | 5.2395      | 6                     | CR02927.1         |
| <i>Hydrogenobaculum</i> sp. Y04AAS1                         | 1.6         | 2                     | CP001301.1        | <i>Bacteroides helgolandicus</i> P 36-108    | 4           | 4                     | CP002352.1        |
| <i>Sulfithydobaculum</i> sp. Y03AOP1                        | 1.8         | 3                     | CP001080.1        | <i>Bacteroides salinarum</i> DSM 18170       | 4.2         | 6                     | CP002530.1        |
| <i>Thermococcus albus</i> DSM 14484                         | 1.5         | 1                     | CP001381.1        | <i>Bacteroides thetaiotaomicron</i> VPI-5182 | 6.29336     | 5                     | AE013928.1        |
| <i>Thermovibrio ammonificans</i> HB-1                       | 1.8         | 3                     | CP002441.1        | <i>Bacteroides vulgatus</i> ATCC 8182        | 5.16319     | 7                     | CP000139.1        |
| <b>Chloroflexi</b>                                          |             |                       |                   |                                              |             |                       |                   |
| <i>Anaerolinea thermophila</i> UNI-1                        | 3.5         | 2                     | AP012029.1        | <i>Blautia</i> sp.                           | 0.61        | 1                     | CP001487.1        |
| <i>Chloroflexus aggregans</i> DSM 9185                      | 4.7         | 3                     | CP001337.1        | <i>Candidatus Amoebophilus asiaticus</i> 542 | 1.9         | 1                     | CP001102.1        |
| <i>Chloroflexus aurantiacus</i> J-10-H                      | 5.3         | 3                     | CP000491.1        | <i>Candidatus Sulcia mellei</i> CAH1         | 0.28        | 3                     | CP002163.1        |
| <i>Chloroflexus</i> sp. Y-400-H                             | 5.3         | 3                     | CP001361.1        | <i>Capsocytophaga ochracea</i> DSM 7271      | 2.6         | 3                     | CP001632.1        |
| <i>Dehalooccoides</i> sp. DAV1                              | 1.3         | 1                     | CP00685.1         | <i>Celiophaga phoenicea</i> DSM 2588         | 4.9         | 3                     | CP002453.1        |
| <i>Dehalooccoides ethenogenus</i> 135                       | 1.5         | 1                     | CP00027.1         | <i>Chlorobaculum parvum</i> NCB 8327         | 9.12735     | 6                     | CP001099.1        |
| <i>Dehalogenimonas lysantricrocopeniens</i> BL-DC-9         | 1.7         | 1                     | CP02381.1         | <i>Chlorobium limicola</i> DSM 273           | 2.289249    | 2                     | CP000096.1        |
| <i>Herpetosiphon aurantiacus</i> ATCC 23779                 | 1.7         | 1                     | CP00281.1         | <i>Chlorobium thalassium</i> ATCC 35110      | 2.361542    | 2                     | CP000492.1        |
| <i>Roseiflexus</i> sp. RS-1                                 | 6.8         | 5                     | CP000875.1        | <i>Chlorobium phaeovirgatum</i> DSM 265      | 3.13390     | 1                     | CP000607.1        |
| <i>Roseiflexus castenholzii</i> DSM 13941                   | 5.8         | 2                     | CP000801.1        | <i>Chlorobium leptidum</i> TLS               | 5.360538    | 1                     | AE000470.1        |
| <i>Sphaerobacter thermophilus</i> DSM 20745                 | 5.7         | 2                     | CP000801.1        | <i>Chloroherpeton thalassium</i> ATCC 33416  | 3.293466    | 1                     | CP001100.1        |
| <i>Thermomicrobium roseum</i> DSM 5159                      | 4.0         | 1                     | CP001231.1        | <i>Cytophaga hutchinsonii</i> ATCC 33466     | 4.432218    | 3                     | CP000383.1        |
| <b>Spirochaetales</b>                                       |             |                       |                   |                                              |             |                       |                   |
| <i>Borrelia afzelii</i> PKo                                 | 1.25783     | 1                     | CP000385.1        | <i>Dryobacter fermentans</i> DSM 18053       | 6.96779     | 4                     | CP001619.1        |
| <i>Borrelia burgdorferi</i> B31                             | 1.51913     | 1                     | AE000783.1        | <i>Flavobacterium johnsoniae</i> UW101       | 6.099572    | 6                     | CP000685.1        |
| <i>Borrelia duttonii</i> Ly                                 | 1.367       | 1                     | CP000976.1        | <i>Gramella taifensis</i> DSM 10623          | 4.63377     | 2                     | CP002542.1        |
| <i>Borrelia garinii</i> FS                                  | 0.952068    | 1                     | CP000033.1        | <i>Halomonobacter hydrossis</i> DSM 1100     | 3.798465    | 2                     | CU207360.1        |
| <i>Borrelia hermslii</i> DAV1                               | 1.0595      | 1                     | CP000048.1        | <i>Kochiobacter</i> sp. 4H-5-7-5             | 5.371086    | 2                     | CP002691.1        |
| <i>Borrelia recurrentis</i> AI                              | 0.350981    | 1                     | CP000963.1        | <i>Lachnatrix</i> sp. 5H-3-7-1               | 3.389963    | 2                     | CP002525.1        |
| <i>Borrelia turicatae</i> 91E135                            | 0.32        | 1                     | CP000491.1        | <i>Leishanella visseppuola</i> DSM 17132     | 3.290168    | 2                     | CP002365.1        |
| <i>Brachyspira hyodysenteriae</i> WA1                       | 3.036       | 1                     | CP001357.1        | <i>Martinetia</i> sp. HTCC2170               | 4.039663    | 2                     | CP002365.1        |
| <i>Brachyspira murdochii</i> DSM 12563                      | 3.2         | 1                     | CP001369.1        | <i>Narvaga tractuosa</i> DSM 1036            | 4.31374     | 2                     | CP002349.1        |
| <i>Brachyspira pilosicoli</i> 367/100                       | 3.2         | 1                     | CP002425.1        | <i>Parabacter prolongetigenus</i> WH4        | 4.382288    | 4                     | CP002544.1        |
| <i>Leptospira biflexa</i> serovar Patoc strain              | 3.256       | 2                     | CP002771.1        | <i>Parabacter distans</i> ATCC 850           | 3.65594     | 3                     | CP002345.1        |
| <i>Leptospira borgpetersenii</i> serovar Hardje-bowis JB107 | 3.87977     | 2                     | AP003550.1        | <i>Parabacter lupinus</i> DSM 2306           | 4.811379    | 7                     | CP001401.1        |
| <i>Leptospira interrogans</i> serovar Lai str. 56601        | 3.87947     | 2                     | CP003690.2        | <i>Parabacter ruminicola</i> DSM 19289       | 5.107383    | 3                     | CP001081.1        |
| <i>Spirochaeta coccoides</i> DSM 7477                       | 4.69224     | 2                     | CP003690.1        | <i>Prevotella albertensis</i> ATCC 35277     | 3.185238    | 2                     | CP002380.1        |
| <i>Spirochaeta sinuogingivae</i> DSM 11293                  | 2.2         | 2                     | CP002116.1        | <i>Prevotella ruminicola</i> 234             | 2.35756     | 4                     | CP002380.1        |
| <i>Spirochaeta</i> sp. Bred05                               | 3.7         | 4                     | CP002511.1        | <i>Prevotella ruminicola</i> 254             | 3.0459      | 4                     | CP002380.1        |
| <i>Spirochaeta thermophila</i> DSM 6102                     | 2.5         | 2                     | CP002511.1        | <i>Prevotellaceae</i> sp. 1                  | 3.512923    | 1                     | CP002380.1        |
| <i>Treponema azototrophicum</i> ZAS-9                       | 3.855671    | 2                     | CP001681.1        | <i>Rhodothermus marinus</i> DSM 4252         | 3.301691    | 1                     | CP001487.1        |
| <i>Treponema brennaborum</i> DSM 12108                      | 3.1         | 3                     | CP002406.1        | <i>Rhodothermus ruber</i> DSM 15868          | 2.151591    | 3                     | CP002346.1        |
| <i>Treponema denticola</i> ATCC 35405                       | 2.81        | 2                     | AE017261.1        | <i>Rubiginosa bifida</i> HTCC2601            | 3.530383    | 2                     | CP001719.1        |
| <i>Treponema pallidum</i> subsp. pallidum SS14              | 1.14        | 2                     | CP002405.1        | <i>Salibacter formosus</i> DSM 10504         | 6.568709    | 2                     | CP002346.1        |
| <i>Treponema parvum</i> subsp. Clinicii A                   | 1.1         | 2                     | CP002403.1        | <i>Sphaerobacter ruber</i> DSM 13855         | 3.551493    | 1                     | CP002346.1        |
| <i>Treponema primitia</i> ZAS-2                             | 4.1         | 2                     | CP001543.1        | <i>Sphaerobacterium</i> sp. 21               | 6.296469    | 4                     | CP002346.1        |
| <i>Treponema succinifaciens</i> DSM 2489                    | 2.87        | 4                     | CP002631.1        | <i>Spirillum</i> sp. 71                      | 8.078757    | 4                     | CP001769.1        |
|                                                             |             |                       |                   | <i>Streptosphaera</i> sp. DSM 71             | 2.272454    | 5                     | CP002455.1        |
|                                                             |             |                       |                   | <i>Wetzelia virosa</i> DSM 16922             | 3.128187    | 3                     | CP001659.1        |
|                                                             |             |                       |                   | <i>Zhongwangia profunda</i> SM-AS7           |             |                       |                   |
